# Supplementary material for: Sedation and analgesia from prolonged pain and stress during mechanical ventilation in preterm infants: is dexmedetomidine an alternative to current practice?
Source: PubMed Central journal article supplement — BMJ Paediatr Open. 2022 May 10;6(1):e001460. doi: 10.1136/bmjpo-2022-001460 (PMC9092181; doi:10.1136/bmjpo-2022-001460), 2022-05-10
Supplement: bmjpo-2022-001460.draft_revisions.pdf [file bmjpo-2022-001460.draft_revisions.pdf]

# BMJ Paediatrics Open

BMJ Paediatrics Open is committed to open peer review. As part of this commitment we make the peer review history of every article we publish publicly available.

When an article is published we post the peer reviewers' comments and the authors' responses online. We also post the versions of the paper that were used during peer review. These are the versions that the peer review comments apply to.

The versions of the paper that follow are the versions that were submitted during the peer review process. They are not the versions of record or the final published versions. They should not be cited or distributed as the published version of this manuscript.

BMJ Paediatrics Open is an open access journal and the full, final, typeset and author-corrected version of record of the manuscript is available on our site with no access controls, subscription charges or pay-per-view fees (<http://bmjpaedsopen.bmj.com>).

If you have any questions on BMJ Paediatrics Open's open peer review process please email [info.bmjpo@bmj.com](mailto:info.bmjpo@bmj.com)

# BMJ Paediatrics Open

## **Sedation and analgesia from prolonged pain and stress during mechanical ventilation in preterm infants: Is dexmedetomidine an alternative to current practice?**

|                               |                                                                                                                                                                                                                                                                                                                                                                |
|-------------------------------|----------------------------------------------------------------------------------------------------------------------------------------------------------------------------------------------------------------------------------------------------------------------------------------------------------------------------------------------------------------|
| Journal:                      | <i>BMJ Paediatrics Open</i>                                                                                                                                                                                                                                                                                                                                    |
| Manuscript ID                 | bmjpo-2022-001460                                                                                                                                                                                                                                                                                                                                              |
| Article Type:                 | Review                                                                                                                                                                                                                                                                                                                                                         |
| Date Submitted by the Author: | 25-Mar-2022                                                                                                                                                                                                                                                                                                                                                    |
| Complete List of Authors:     | Ojha, Shalini; University of Nottingham, School of Medicine; University Hospitals of Derby and Burton NHS Foundation Trust, Neonatal Unit<br>Abramson, Janine; University of Nottingham School of Health Sciences, Division of Medical Sciences and GEM<br>Dorling, Jon; University Hospital Southampton NHS Foundation Trust, Department of Neonatal Medicine |
| Keywords:                     | Neonatology, Pain, Pharmacology, Therapeutics                                                                                                                                                                                                                                                                                                                  |
|                               |                                                                                                                                                                                                                                                                                                                                                                |

SCHOLARONE™  
Manuscripts

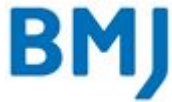

I, the Submitting Author has the right to grant and does grant on behalf of all authors of the Work (as defined in the below author licence), an exclusive licence and/or a non-exclusive licence for contributions from authors who are: i) UK Crown employees; ii) where BMJ has agreed a CC-BY licence shall apply, and/or iii) in accordance with the terms applicable for US Federal Government officers or employees acting as part of their official duties; on a worldwide, perpetual, irrevocable, royalty-free basis to BMJ Publishing Group Ltd ("BMJ") its licensees and where the relevant Journal is co-owned by BMJ to the co-owners of the Journal, to publish the Work in this journal and any other BMJ products and to exploit all rights, as set out in our [licence](#).

The Submitting Author accepts and understands that any supply made under these terms is made by BMJ to the Submitting Author unless you are acting as an employee on behalf of your employer or a postgraduate student of an affiliated institution which is paying any applicable article publishing charge ("APC") for Open Access articles. Where the Submitting Author wishes to make the Work available on an Open Access basis (and intends to pay the relevant APC), the terms of reuse of such Open Access shall be governed by a Creative Commons licence – details of these licences and which [Creative Commons](#) licence will apply to this Work are set out in our licence referred to above.

Other than as permitted in any relevant BMJ Author's Self Archiving Policies, I confirm this Work has not been accepted for publication elsewhere, is not being considered for publication elsewhere and does not duplicate material already published. I confirm all authors consent to publication of this Work and authorise the granting of this licence.

1  
2  
3  
4 **Title: Sedation and analgesia from prolonged pain and stress during mechanical**  
5  
6 **ventilation in preterm infants: Is dexmedetomidine an alternative to current practice?**  
7  
8  
9

10  
11  
12 **Authors**  
13

14  
15  
16 1. Shalini Ojha

17 [shalini.ojha@nottingham.ac.uk](mailto:shalini.ojha@nottingham.ac.uk)

18  
19 Academic Unit of Lifespan and Population Health, School of Medicine, University of  
20 Nottingham, Nottingham, UK and Neonatal Unit, University Hospitals of Derby and  
21 Burton NHS Trust, Derby, UK  
22  
23  
24

25  
26 2. Janine Abramson

27 [Janine.abramson@nottingham.ac.uk](mailto:Janine.abramson@nottingham.ac.uk)

28  
29 Academic Unit of Lifespan and Population Health, School of Medicine, University of  
30 Nottingham, Nottingham, UK  
31  
32  
33

34  
35 3. Jon Dorling

36 [Jon.dorling@uhs.nhs.uk](mailto:Jon.dorling@uhs.nhs.uk)

37  
38 Neonatal Intensive Care Unit, University Hospitals of Southampton, Southampton,  
39  
40 UK  
41  
42  
43

44 **Corresponding author:** Dr Shalini Ojha, Academic Unit of Lifespan and Population Health,  
45 School of Medicine, University of Nottingham. Room 4117, Medical School Building, Royal  
46 Derby Hospital, Derby DE22 3NE; email: [shalini.ojha@nottingham.ac.uk](mailto:shalini.ojha@nottingham.ac.uk)  
47  
48  
49

50  
51 **Orchid ID:** <https://orcid.org/0000-0001-5668-4227>  
52  
53

54 **Short title:** Dexmedetomidine in newborn infants  
55

56  
57 **Funding Support:** The authors did not receive any external funding.  
58  
59  
60

### Patient and Public Involvement statement

How was the development of the research question and outcome measures informed by patients' priorities, experience, and preferences?

- N/A

How did you involve patients in the design of this study?

- N/A

Were patients involved in the recruitment to and conduct of the study?

- There was no direct patient involvement.

How will the results be disseminated to study participants?

- The results of the study will be communicated via Bliss, UK's largest charity for sick and preterm infants, and via social media accounts of the authors and their institutions.

For randomised controlled trials, was the burden of the intervention assessed by patients themselves?

- N/A

Patient advisers should also be thanked in the contributorship statement/acknowledgements.

- N/A

**Word count: 2630**

**Number of tables: 5**

**Number of figures: 0**

### Contributors' statement

SO and JD conceived the piece. SO led the write up. JA conducted the literature search and completed the study summaries. SO, JD, and JA revised and approved the final manuscript.

All authors approved the final manuscript as submitted and agree to be accountable for all aspects of the work.

**Conflict of Interest Disclosures and funding sources:** Shalini Ojha has received funds from the National Institute of Health Research, UK and the Medical Research Council, UK for other research. Jon Dorling has received funds from the National Institute of Health Research, UK, Canadian Institute for Health Research, Canada, Nova Scotia Research, Canada and Action Medical Research, UK for other research. The authors have no other conflicts of interest relevant to this article to disclose.

**Abstract** (292/300 words)

Mechanical ventilation is an uncomfortable and potentially painful intervention. Opioids, such as morphine and fentanyl are used for analgesia and sedation but there is uncertainty whether they reduce pain in mechanically ventilated infants. Moreover, there may be short and long-term adverse consequences such as respiratory depression leading to prolonged mechanical ventilation and detrimental long-term neurodevelopmental effects. Despite this, opioids are widely used, possibly due to a lack of alternatives.

Dexmedetomidine, a highly selective alpha-2-adrenergic agonist with analgesic and sedative effects, currently approved for adults, has come into use in newborn infants. It provides analgesia and simulates natural sleep with maintenance of spontaneous breathing and upper airway tone. Although data on pharmacokinetics-pharmacodynamics in preterm infants are scant, observational studies report that using dexmedetomidine in conjunction with opioids/benzodiazepines or on its own can reduce the cumulative exposure to opioids/benzodiazepines. As it does not cause respiratory depression, dexmedetomidine could enable quicker weaning and extubation. Dexmedetomidine has also been suggested as an adjunct to therapeutic hypothermia in hypoxic ischaemic encephalopathy and others have used it during painful procedures and surgery. Dexmedetomidine infusion can cause bradycardia and hypotension although most report clinically insignificant effects.

The increasing number of publications of observational studies and clinical use demonstrates that dexmedetomidine is being used in newborn infants but data on safety and efficacy are scant and not of high-quality. Importantly, there are no data on long term neurodevelopmental impact on preterm or term-born infants. The acceptance of dexmedetomidine in routine clinical practice must be preceded by clinical evidence. We need adequately powered and well-designed randomised controlled trials investigating whether dexmedetomidine alone or with opioids/benzodiazepines in infants on mechanical

1  
2  
3 ventilation reduces the need for opioids/benzodiazepine and improves neurodevelopment at  
4  
5 24 months and later as compared to the use of opioids/benzodiazepines alone.  
6  
7  
8  
9  
10  
11  
12  
13  
14  
15  
16  
17  
18  
19  
20  
21  
22  
23  
24  
25  
26  
27  
28  
29  
30  
31  
32  
33  
34  
35  
36  
37  
38  
39  
40  
41  
42  
43  
44  
45  
46  
47  
48  
49  
50  
51  
52  
53  
54  
55  
56  
57  
58  
59  
60

Confidential: For Review Only



1  
2  
3 **Key words:** infant, preterm; dexmedetomidine, mechanical ventilation  
4  
5  
6  
7  
8

9 **Abbreviations:** BP, blood pressure; GA, gestational age; HIE, hypoxic-ischaemic  
10 encephalopathy; HR, heart rate; IQR, inter-quartile range; IVH, intraventricular haemorrhage;  
11 LD, loading dose; MD, maintenance dose; NEC, necrotising enterocolitis; NICU, neonatal  
12 intensive care unit; PD, pharmacodynamics; PK, pharmacokinetics; PMA, post-menstrual  
13 age; TH, therapeutic hypothermia  
14  
15  
16  
17  
18  
19  
20  
21  
22  
23  
24  
25  
26  
27  
28  
29  
30  
31  
32  
33  
34  
35  
36  
37  
38  
39  
40  
41  
42  
43  
44  
45  
46  
47  
48  
49  
50  
51  
52  
53  
54  
55  
56  
57  
58  
59  
60

## Key Messages

- Mechanical ventilation is a potentially painful intervention. Opioids and benzodiazepines are widely used to provide analgesia and sedation in mechanically ventilated infants.
- Evidence suggests that opioids may be ineffective analgesics and there may be adverse consequences such as respiratory depression and detrimental long-term neurodevelopmental effects.
- Dexmedetomidine, a highly selective alpha-2-adrenergic agonist provides analgesia and simulates natural sleep with maintenance of spontaneous breathing and upper airway tone.
- Emerging observational studies suggest that dexmedetomidine use in mechanically ventilated infants may reduce exposure to opioids/benzodiazepines and enable quicker weaning and extubation.
- However, data on safety and efficacy are scant. Adequately powered randomised controlled trials investigating use of dexmedetomidine in preterm infants are required.

## Introduction

Mechanical ventilation via a tracheal tube is widely used for respiratory support in preterm infants. In England and Wales, despite the increase in use of non-invasive respiratory support, 57% of very preterm infants were mechanically ventilated on the day of birth and many others require ventilatory support later in the course of their care [1]. This included 91% of extremely preterm infants and the increasing survival of those born at these gestations could lead to further increases in the use of mechanical ventilation in neonatal care.

It is now well accepted that preterm infants perceive pain. Mechanical ventilation is an uncomfortable and potentially painful intervention. Ventilated infants are, often, also subjected to multiple painful procedures and experience pain caused by underlying diseases such as necrotising enterocolitis (NEC) [2,3]. Pain and stress cause cardiorespiratory instability including interference with the ventilator synchronising with the infant's breathing efforts that lead to suboptimal ventilation, fluctuations in heart rate (HR), respiratory rate, blood pressure (BP), and oxygen saturation with complications such as intraventricular haemorrhages (IVH) and metabolic instability [4].

## Pain in preterm infants

Preterm infants have enhanced hormonal and physiological responses to pain. In 1987, Anand et al., showed that preterm infants undergoing patent ductus arteriosus surgery who did not receive fentanyl had a significantly higher hormonal stress response compared to those who received fentanyl [5]. More recently, magnetic resonance imaging studies identified that exposure to pain and stress in neonatal care alters corticospinal tract, and subcortical white matter development with further evidence of reduced volume of the somatosensory thalamus and changes in the cortex, limbic system and basal ganglia, and the white matter that persist into school age [6].

1  
2  
3 Management of pain and agitation is fundamental to good intensive care, yet neonatal pain  
4 is inconsistently assessed and inadequately managed [3]. A prospective cohort study of 243  
5 European neonatal intensive care units (NICUs), the European Pain Audit in Neonates  
6 (EUROPAIN), reported 34% of admissions, including 82% of those who were mechanically  
7 ventilated, received some sedation or analgesia [7]. A retrospective cohort study from 348  
8  
9  
10  
11  
12  
13  
14  
15  
16  
17  
18  
19  
20  
21  
22  
23  
24  
25  
26  
27  
28  
29  
30  
31  
32  
33  
34  
35  
36  
37  
38  
39  
40  
41  
42  
43  
44  
45  
46  
47  
48  
49  
50  
51  
52  
53  
54  
55  
56  
57  
58  
59  
60  
Pediatrics Medical Group NICUs in the USA found that infants received a sedative, analgesic  
or paralytic only on 33% of days that they were mechanically ventilated [8].

Although optimal management of pain and sedation during mechanical ventilation is as yet  
undiscovered, selective use of continuous infusion of opioids is recommended for infants  
who are mechanically ventilated for prolonged periods [3,9]. These recommendations stand  
despite the 2021 update of the Cochrane review that concluded that there is uncertainty  
whether opioids have any effect on reducing pain in mechanically ventilated infants [2]. In  
addition, there may be short and long-term adverse consequences of morphine infusion in  
preterm infants such as respiratory depression leading to prolonged duration of mechanical  
ventilation and detrimental long-term neurodevelopmental effects. The Cochrane systematic  
review [2] includes one trial that reported neurodevelopment at 18-24 months: Ancora 2013  
[10] (RR 2.00, 95% CI 0.39 to 10.29; 78 participants); and one study that reported  
neurodevelopment outcomes at 5-6 years of age [11]: MacGregor 1998 (RR 1.60, 95% CI  
0.56 to 4.56; 95 participants) and concluded the evidence was uncertain. Puia-Dumitrescu et  
al., [12], performed a post-hoc analysis of infants who participated in the Preterm  
Erythropoietin Neuroprotection Trial to investigate the effect of exposure to opioids and  
benzodiazepines on development at 22-26 months' corrected age. Of the 936 extremely  
preterm infants 481 (51%) received opioids; 297 (32%) received both opioids and  
benzodiazepines; and 20 (2%) received benzodiazepines only. Infants exposed to both  
groups of drugs had more co-morbidities compared to those exposed to only one or none  
with higher adjusted odds of IVH, NEC, severe bronchopulmonary dysplasia, and  
retinopathy of prematurity, and longer length of hospital stay. Outcomes at 2-years were

1  
2  
3 negatively associated with the combined use of opioids and benzodiazepines even after  
4  
5 adjusting for potential confounders. The lowest scores were noted among the infants who  
6  
7 received the drugs for more than 7 days (median (IQR) score of 85 (73-97)) compared to 97  
8  
9 (91-107) in infants with no exposure. However, this was not a randomised allocation and the  
10  
11 higher prevalence of multiple co-morbidities in the group that received drugs makes it difficult  
12  
13 to interpret the results.  
14

15  
16 Despite these uncertainties, opioids are the most popular choice for management of pain  
17  
18 and sedation in mechanically ventilated infants. Of the 2142 mechanically ventilated infants  
19  
20 included in the EUROPAIN audit, morphine and fentanyl were given to 923 (43%) and 639  
21  
22 (29%) infants, respectively, while 536 (25%) received midazolam [7]. Zimmerman et al.  
23  
24 similarly reported that in 433,587 ventilated-days, fentanyl (17%), midazolam (14%) and  
25  
26 morphine (9%) were the most frequently administered drugs [8]. They also reported increase  
27  
28 in administration of opioids during mechanical ventilation from 5% of ventilated days in 1997  
29  
30 to 32% in 2012. In the UK, the percentage of very preterm infants who receive intravenous  
31  
32 morphine increased from 32% in 2010 to 37% in 2017 [13].  
33  
34  
35

### 36 **Dexmedetomidine: an alternative agent for pain and sedation in newborn infants**

37  
38 This high use of opioids despite the uncertainty about benefit and harm is possibly due to a  
39  
40 lack of alternative agents that could provide adequate and safe sedation and analgesia in  
41  
42 newborn infants. Recently, dexmedetomidine, a highly selective alpha-2-adrenergic agonist  
43  
44 (1600:1:: $\alpha$ 2: $\alpha$ 1 specificity) with sedative and analgesic effects has come into use in newborn  
45  
46 infants receiving mechanical ventilation [14]. Several recent studies have explored the off-  
47  
48 label use of dexmedetomidine in newborn infants for sedation and analgesia in NICU  
49  
50 settings. A summary of the studies is given in Tables 1-4.  
51  
52  
53

54  
55 Dexmedetomidine, first approved by the USA Food and Drug Administration in 1999 is  
56  
57 similarly authorised by the European Medicine Agency [15] for use for sedation in adult  
58  
59 intensive care unit patients requiring sedation level no deeper than arousal in response to  
60

1  
2  
3 verbal stimulation and for sedation of non-intubated patients prior to and/or during diagnostic  
4 or surgical procedures requiring sedation. It provides analgesia via inhibition of substance P  
5 release from the dorsal horns of the spinal cord while the anxiolysis and sedation are  
6 believed to be due to the reduction in sympathetic outflow from the locus coeruleus [16]. It  
7 stimulates the natural sleep pathways and induces activity similar to non-REM sleep in  
8 adults and children [17]. The effects on respiration and airway also mimic natural sleep and  
9 therefore maintain spontaneous breathing and upper airway tone [17].  
10  
11  
12  
13  
14  
15  
16  
17  
18

19 Although there are no data to examine the early exposure to dexmedetomidine and long-  
20 term neurocognitive function in children, animal studies suggest that dexmedetomidine may  
21 have some neuroprotective effects including cell-protective effects under ischemic conditions  
22 and after traumatic brain injury [18]. In rodents, cortical and white matter loss after hypoxic-  
23 ischaemic injury may be prevented by dexmedetomidine [19]. However, when combined with  
24 hypothermia, Ezzati et al., found that dexmedetomidine was associated with adverse  
25 cardiovascular events and was neurotoxic following hypoxia-ischaemia [20]. No clinical  
26 studies have investigated the impact of dexmedetomidine on neurological outcomes or  
27 neurodevelopment in preterm or term-born infants.  
28  
29  
30  
31  
32  
33  
34  
35  
36  
37  
38

### 39 **Pharmacological studies on dexmedetomidine in newborn infants**

40  
41  
42 The evaluation of pharmacokinetic (PK), pharmacodynamics (PD), efficacy and safety of  
43 drugs in vulnerable newborn infants is challenging [14]. Dexmedetomidine is metabolised via  
44 glucuronidation, hydroxylation (via CYP2A6), and N-methylation and primarily eliminated via  
45 the urine [21]. As these pathways, particularly glucuronidation, are immature in the first year  
46 after birth, dexmedetomidine clearance may be decreased but there is a lack of PK-PD  
47 studies in preterm infants [17].  
48  
49  
50  
51  
52  
53  
54

55 The therapeutic window for dexmedetomidine in older children is 0.4 to 0.8 mcg/L (optimum  
56 level around 0.6 mcg/L) [22] with a safety measure of maintaining plasma concentrations  
57 below 1mcg/L and is assumed to be the same in neonatal studies [14]. The drug is available  
58  
59  
60

1  
2  
3 as dexmedetomidine hydrochloride (100 mcg/mL) [23], usually delivered in a concentration  
4 of 1 mcg/ml as a loading dose (LD) over 10-20 min and maintenance dose (MD) as  
5 continuous infusion using rate-controlled syringe pumps. In a phase II/III open-label, safety,  
6 efficacy, and PK trial including 11 centres, Chrysostomou et al., investigated three escalating  
7 dose regimens (LD followed by MD) of dexmedetomidine mechanically ventilated 28-44  
8 weeks' GA infants [24]. In 42 infants (18 preterm and 24 term-born), they found that  
9 additional sedation (midazolam) was required only in 4 infants (all term-born) while additional  
10 analgesia (fentanyl or morphine) was required in 17 infants (3 preterms, and 14 term-born).  
11 Using the Neonatal Pain and Sedation Scale (N-PASS), they found that at all three dose  
12 levels, infants had signs of pain or agitation (N-PASS score >3) at 5% time-points only. Van  
13 Dijkman et al., performed a dose-finding study of dexmedetomidine in mechanically  
14 ventilated newborn infants who received dexmedetomidine infusion over 24-hours. Initial  
15 dosing (0.3 mcg/kg/h) was determined by extrapolation of previously published PK of  
16 dexmedetomidine in older children and was subsequently increased to 0.4 mcg/kg/h in the  
17 follow-up phase due to higher clearance of the drug. Additional sedation was required in  
18 83% of the participants as indicated by Comfort-neo scores. In 7 term infants with HIE and  
19 therapeutic hypothermia (TH), McAdams et al., found that dexmedetomidine clearance was  
20 either comparable or lower but volume of distribution was larger compared to estimates in  
21 normothermic infants [25]. They recommended doses up to 0.4 mcg/kg/h and that a LD may  
22 be needed to achieve therapeutic concentration without a lag. Dose regimens used in  
23 published clinical studies of preterm infants and available neonatal formularies are given in  
24 Table 5.

### 51 **Clinical reports of use of dexmedetomidine in preterm infants**

52  
53 Case reports of dexmedetomidine use to sedate a difficult to ventilate 24 weeks' gestational  
54 age (GA) infant [16] and others reporting adverse effects [26,27] were followed by larger  
55 single centre studies. Use has been reported in extremely preterm infants in the first weeks  
56 after birth [16,28], in preterm infants at later postmenstrual ages (PMA) and term-born

1  
2  
3 infants [21,29–31], after surgical procedures [29,30], and in infants undergoing therapeutic  
4  
5 hypothermia (TH) for hypoxic ischaemic encephalopathy (HIE) [19,32,33].  
6  
7

8 Dexmedetomidine is used for sedation and analgesia on its own or in combination with other  
9  
10 agents with the aim of reducing cumulative exposure to opioids and benzodiazepines.  
11

12 Comparing 48 infants with a mean GA of 25 weeks who received either fentanyl or  
13  
14 dexmedetomidine, O'Mara et al., found that the dexmedetomidine group required less  
15  
16 adjunctive sedation [28]. Comparing 39 infants who received dexmedetomidine, (including  
17  
18 28 who concomitantly received opioid infusion) with 39 matched controls who only received  
19  
20 opioids, Sellas et al., found that there was no difference in the duration of use or the number  
21  
22 of doses of opioids but the total dose of opioids received was lower in the group that  
23  
24 received dexmedetomidine [29]. With an aim to reduce benzodiazepine exposure in infants  
25  
26 who were at least 35 weeks' PMA and needed sedation for mechanical ventilation, Morton et  
27  
28 al., implemented a quality improvement project with a sedation guideline recommending the  
29  
30 use of dexmedetomidine as initial agent or in addition to midazolam. They demonstrated  
31  
32 reduction in use of midazolam with fewer infants receiving midazolam, increased midazolam-  
33  
34 free days, and lower daily midazolam doses in those who received additional  
35  
36 dexmedetomidine without any increase in the mean duration of sedation episodes [31]. In 38  
37  
38 infants at a median PMA of 38.8 weeks, of whom 30 were post-surgical, Dersch-Mills et al.,  
39  
40 found that the opioid infusion was reduced within 24 hours of initiation of dexmedetomidine  
41  
42 in 12 of the 18 infants who were on concomitant opioids [30].  
43  
44  
45

46  
47 As dexmedetomidine does not cause respiratory depression, it is postulated that its use with  
48  
49 no or reduced doses of opioids should enable quicker weaning off mechanical ventilation  
50  
51 and support extubation. O'Mara et al., found a significantly shorter duration of mechanical  
52  
53 ventilation in those who received dexmedetomidine compared to those on fentanyl only  
54  
55 (mean  $\pm$  SD: 14.4  $\pm$  7.3 vs. 28.4  $\pm$  9.9;  $p < 0.0001$ ). They also reported that clinicians  
56  
57 extubated 19 of 28 infants who received dexmedetomidine while receiving infusion of the  
58  
59 drug at the time of extubation. Due to the early extubation, fewer infants received  
60



1  
2  
3 dexamethasone (4 vs. 11) and there were fewer chest-X-rays performed (mean  $\pm$  SD: 28  $\pm$   
4 8.8 vs. 49  $\pm$  13.8) in the dexmedetomidine group compared to those who received fentanyl.

5  
6  
7  
8 The main concerns with dexmedetomidine use are bradycardia and hypotension.

9  
10 Chrysostomou et al., found, in 42 neonates, that the HR decreased by an average of 12%  $\pm$   
11 9% and systolic BP decreased by 14%  $\pm$  12% at 6-7 hours of starting the dexmedetomidine  
12 infusion [24]. Although mostly reported to be not of clinical significance, dexmedetomidine  
13 can induce reduction in HR and BP. Dersch-Mills et al., analysed adverse effects in 38  
14 infants, 36 of whom were also receiving opioid infusion and found that 25 had at least one  
15 episode of bradycardia (drop of >20bpm from baseline lasting for >2 hours) including 7 who  
16 had a drop of >40bpm. Hypotension occurred in 15 infants. Dopamine was used  
17 concurrently in 17 infants of which 5 were started on dopamine after the initiation of  
18 dexmedetomidine. No infants had dexmedetomidine infusion discontinued due to adverse  
19 effects [30]. Similarly, Sellas et al., found that 5 of 39 infants who received dexmedetomidine  
20 experienced episodes of bradycardia as compared to 2 of 39 in the no-dexmedetomidine  
21 group although all episodes were self-limiting and did not require any intervention [29].  
22  
23 O'Mara et al., measured BP and HR hourly and did not see any appreciable effect on either  
24 in those on dexmedetomidine compared to the infants on fentanyl [28] and Morton et al.,  
25 reported that following their initiative to increase use of dexmedetomidine in mechanically  
26 ventilated infants, one infant had dexmedetomidine discontinued due to bradycardia without  
27 haemodynamic compromise however discontinuing the drug did not resolve the bradycardia  
28 [31]. Estkowski et al., compared neonates in a Paediatric Intensive Care Unit with older  
29 infants and found that among the 28 neonates, 4 experienced hypotension and 2 had  
30 bradycardia as compared to 30 and 55 of 99 infants who had hypotension and bradycardia,  
31 respectively. Three neonates required fluid bolus, 1 had dopamine infusion started after  
32 dexmedetomidine and 4 had dexmedetomidine discontinued due to adverse events [21].  
33  
34  
35  
36  
37  
38  
39  
40  
41  
42  
43  
44  
45  
46  
47  
48  
49  
50  
51  
52  
53  
54  
55  
56  
57

## 58 **Conclusions and recommendations**

59  
60

1  
2  
3 Emerging clinical data suggest that dexmedetomidine may be an alternative to opioids and  
4 benzodiazepines for managing pain and sedation in mechanically ventilated newborn  
5 infants. It may help reduce the exposure to these agents and as it does not cause respiratory  
6 depression, it may facilitate quicker extubation. The potential neuroprotective effect on the  
7 immature brain could ease the concerns about the impact of pain and stress and that of  
8 opioids and benzodiazepines on the developing brain. However, despite the creeping  
9 acceptance of its use in this population, there are no robust data to demonstrate either the  
10 efficacy or the safety of this drug in preterm infants. The studies discussed above are  
11 observational and mostly retrospective chart reviews. It is encouraging to see robust PK-PD  
12 studies focussing on determining the optimal dose regimens [14] and a Cochrane systematic  
13 review was registered in 2016 [34] but there are no completed RCTs or systematic reviews  
14 of use of dexmedetomidine in preterm infants. The increasing number of publications of  
15 observational studies and use in clinical practice as seen by the availability of neonatal drug  
16 formularies for its use demonstrates evolving practice that dexmedetomidine is being used in  
17 newborn infants in neonatal units. The data on safety and efficacy are scant and not of high-  
18 quality and there are no data on long term neurodevelopmental impact on preterm or term-  
19 born infants. We found one registered pilot RCT [20] in term infants undergoing TH for HIE  
20 and one investigating the use of bolus dose for supporting less invasive surfactant  
21 administration in preterm infants (Table 6).

22  
23  
24 The acceptance of dexmedetomidine in routine clinical practice must be preceded by clinical  
25 evidence. We need adequately powered and well-designed randomised controlled trials  
26 investigating whether dexmedetomidine alone or in conjunction with  
27 opioids/benzodiazepines in preterm infants who require analgesia and sedation during  
28 mechanical ventilation reduces the need for opioids/benzodiazepine and improves  
29 neurodevelopment at 24 months and later as compared to the use of  
30 opioids/benzodiazepines alone.

**Table 1. Summary of clinical studies of dexmedetomidine in newborn infants: studies with a comparator group that did not receive any dexmedetomidine**

| Randomised controlled trials or quasi-randomised controlled trials - NONE |                                                                          |                                                                                                        |                                                                                                              |                                                                                              |                                                                                                                                                                                                                                                                                                                                                                                                                                                                                                                 |
|---------------------------------------------------------------------------|--------------------------------------------------------------------------|--------------------------------------------------------------------------------------------------------|--------------------------------------------------------------------------------------------------------------|----------------------------------------------------------------------------------------------|-----------------------------------------------------------------------------------------------------------------------------------------------------------------------------------------------------------------------------------------------------------------------------------------------------------------------------------------------------------------------------------------------------------------------------------------------------------------------------------------------------------------|
| Observational studies with comparator with no dexmedetomidine             |                                                                          |                                                                                                        |                                                                                                              |                                                                                              |                                                                                                                                                                                                                                                                                                                                                                                                                                                                                                                 |
| Reference Setting                                                         | Study design                                                             | Inclusion criteria                                                                                     | Dexmedetomidine group                                                                                        | Comparator                                                                                   | Outcomes Notes                                                                                                                                                                                                                                                                                                                                                                                                                                                                                                  |
| O'Mara 2012 [28]<br>USA<br>Single centre                                  | Retrospective case-control<br>Jan 2005-May 2010                          | <36 weeks' GA at birth,<br>< 2 weeks of life at study entry<br>AND<br>receiving mechanical ventilation | N= 24<br>GA: 25.5.±.1.7<br>BW: 832.±.204.2g                                                                  | Fentanyl<br>N=24<br>GA: 24.9.±.1.6<br>BW: 675.±.164.2                                        | Dexmedetomidine group had <ul style="list-style-type: none"> <li>- Shorter duration of treatment (12.5 vs. 20d)</li> <li>- Similar number of sedative boluses per day (1.7 vs. 3) but in total less total additional sedation</li> <li>- More number of days free of additional sedation</li> <li>- Reduction in number of days on mechanical ventilation (14.4(7.3) vs. 28.4(9.9))</li> <li>- Better GI function in including earlier establishment of full feeds</li> <li>- Less late onset sepsis</li> </ul> |
| Sellas 2019 [29]<br>USA<br>Single centre                                  | Retrospective cohort study with matched controls<br>Jan 2010 to Aug 2015 | Invasive surgical procedure<br>Required at least 6h of continuous sedation and/or analgesia            | Received dexmedetomidine in addition to opioids<br>N=39<br>GA: 37 (29-39)<br>PMA at surgery:39 (29-59) weeks | Opioids only (morphine or fentanyl)<br>N= 39<br>GA: 37 (27-38)<br>PMA at surgery: 37 (27-41) | 28/39 (72%) of those who received dexmedetomidine also received opioids<br>Dexmedetomidine group had <ul style="list-style-type: none"> <li>- More episodes of bradycardia (12.8% vs 5.1%; p = 0.01)</li> <li>- No difference in episodes of hypotension or respiratory depression.</li> <li>- Lower cumulative dose of opioids (1155 mcg/kg vs 1841 mcg/kg; p = 0.01)</li> </ul>                                                                                                                               |

|                                          |                                                                                                                         |                                                                                           |                                                                                  |                                                             |                                                                                                                                                                                                                                                                                                                                                                                                             |
|------------------------------------------|-------------------------------------------------------------------------------------------------------------------------|-------------------------------------------------------------------------------------------|----------------------------------------------------------------------------------|-------------------------------------------------------------|-------------------------------------------------------------------------------------------------------------------------------------------------------------------------------------------------------------------------------------------------------------------------------------------------------------------------------------------------------------------------------------------------------------|
|                                          |                                                                                                                         |                                                                                           |                                                                                  |                                                             | - No difference in the number of supplemental doses of opioids                                                                                                                                                                                                                                                                                                                                              |
| Morton 2021 [31]<br>USA<br>Single centre | QI initiative to reduce benzodiazepine exposure during<br>Pre-QI: Jan 2015 to Feb 2018<br>Post-QI: Mar 2018 to Dec 2019 | At least 35 weeks' PMA<br><14 d of sedation<br>Sedation needed for mechanical ventilation | Guideline and QI initiative to promote use of escalating dose of dexmedetomidine | Midazolam and no specific guideline for dexmedetomidine use | Proportion of infants receiving any dexmedetomidine increased from 18% to 49%<br>Infants receiving only dexmedetomidine increased from 3% to 33%<br>Infants receiving any midazolam decreased from 95% to 65%<br>Infants who received dexmedetomidine received less daily midazolam (1.3 mg/kg/d vs. 2.2 mg/kg/d)<br>Increase in midazolam free days<br>No difference in mean duration of sedation episodes |

**Table 2. Summary of clinical studies of dexmedetomidine in newborn infants: studies without a comparator group that did not receive any dexmedetomidine**

| Study ID<br>Setting                         | Study design                                                         | Inclusion criteria                                                                             | Intervention                                                                                                                               | Outcomes                                                                                                                                                             |
|---------------------------------------------|----------------------------------------------------------------------|------------------------------------------------------------------------------------------------|--------------------------------------------------------------------------------------------------------------------------------------------|----------------------------------------------------------------------------------------------------------------------------------------------------------------------|
| Chrysostomou 2014 [24]<br>USA<br>11 centres | phase II/III, open-label, multicentre safety, efficacy, and PK trial | intubated and mechanically ventilated neonates<br>gestational age $\geq 28$ to $\leq 44$ weeks | Dosing: 3 phases<br>level 1: loading dose (LD), 0.05 mg/kg; maintenance dose (MD), 0.05 mg/kg/h<br>level 2: LD, 0.1 mg/kg; MD, 0.1 mg/kg/h | Need for additional sedation: no preterms; 4 term (midazolam)<br>Need for additional analgesia: 17 (40%) – 3 preterms (fentanyl); 14 term (fentanyl and/or morphine) |

|                                                                   |                                                           |                                                                                                |                                                                                                                            |                                                                                                                                                                                                                                                                                                                                                                                                                                                                                                                                                                                                                                                                                                                          |
|-------------------------------------------------------------------|-----------------------------------------------------------|------------------------------------------------------------------------------------------------|----------------------------------------------------------------------------------------------------------------------------|--------------------------------------------------------------------------------------------------------------------------------------------------------------------------------------------------------------------------------------------------------------------------------------------------------------------------------------------------------------------------------------------------------------------------------------------------------------------------------------------------------------------------------------------------------------------------------------------------------------------------------------------------------------------------------------------------------------------------|
|                                                                   |                                                           | anticipated to require a minimum of 6 hours of continuous IV sedation<br>excluded <1kg infants | level 3: LD, 0.2 mg/kg; MD, 0.2 mg/kg/h.<br>N= 42 (18 preterm; 24 term)<br>N-PASS tool for need of sedation and analgesia  | N-PASS scores: 5% >+3 in pain; 77% between -5 and +3 (adequate) and 18% ≤-6 deep sedation<br><br>HR decreased by an average of 12%±9% at 7.7±7.3 h, and systolic BP decreased by 14%±12% at 6.5±7 h<br><br>Other adverse effects: 26 (62%) patients (11 preterm and 15 term) – diastolic hypotension, hypertension, agitation, respiratory acidosis. No discontinuation, no significant lab or ECG abnormalities                                                                                                                                                                                                                                                                                                         |
| Estkowski 2015 [21]<br>USA PICU<br>Single centre                  | Retrospective chart review<br>Oct 2007 to Aug 2012        | at least 37 weeks PMA                                                                          | Compared neonates (up to 28 days of CGA) to infants (28d CGA to 1y)<br>Neonates: N= 28 (13 born preterm)<br>Infants: N= 99 | Neonates as compared to infants had:<br><ul style="list-style-type: none"><li>- Similar minimum infusion rates</li><li>- Lower median maximum dosage: 0.4 mcg/kg/hr (IQR, 0.26-0.6) vs. 0.6 mcg/kg/hr (IQR, 0.4–0.8) (p &lt; 0.01)</li><li>- Similar duration of use: 41 (17-76) hr</li><li>- Fewer had any episode of bradycardia: 2/28 [7%] vs. 55/99 [56%] (p &lt; 0.01)</li><li>- Similar incidence of hypotension: 4/28 (14%) vs. 30/99 (30%) (p = 0.15)</li></ul> In neonates:<br>3/28 (11%) received a fluid bolus<br>4/28 (14%) dexmedetomidine discontinued due to cardiovascular adverse effects<br>In infants:<br>3/99 discontinued infusion due to bradycardia<br>75/99 (76%) had additional sedative agents |
| Dersch-Mills 2019 [30]<br>Canada<br>Single centre (out-born NICU) | Retrospective observational study<br>Dec 2014 to Dec 2016 | Received dexmedetomidine for ≥3 h                                                              | N=38 (30 for surgery)<br>GA: 37.1 (30.7-38.3)<br>17 preterms; 41 (6-74) days old<br>BW: 2605 (1721-3212)                   | 32/38, at least one adverse effect<br><ul style="list-style-type: none"><li>- 15, hypotension</li><li>- 25 bradycardia (drop of ≥20bpm from baseline)</li><li>- 7 severe bradycardia (drop of ≥40 bpm from baseline)</li></ul>                                                                                                                                                                                                                                                                                                                                                                                                                                                                                           |

|  |  |  |                                                                                                                    |                                                                                                                                 |
|--|--|--|--------------------------------------------------------------------------------------------------------------------|---------------------------------------------------------------------------------------------------------------------------------|
|  |  |  | used for mean (range): 11.1(0.13 to 58) days<br>most (36/38) received concomitant opioid infusion, mostly fentanyl | - No dose adjustment or discontinuation for any adverse effect<br><br>Withdrawal: 22/38 had tachycardia and increase NAS scores |
|--|--|--|--------------------------------------------------------------------------------------------------------------------|---------------------------------------------------------------------------------------------------------------------------------|

**Table 3. Summary of case reports of dexmedetomidine in newborn infants**

| Reference Setting      | Case description                                                                                                                                                                                                                                          | outcomes Notes                                                                                                                                   |
|------------------------|-----------------------------------------------------------------------------------------------------------------------------------------------------------------------------------------------------------------------------------------------------------|--------------------------------------------------------------------------------------------------------------------------------------------------|
| Finkel 2007 [26] USA   | 2 day old, 3 kg female<br>Repair of bladder exstrophy<br>Received dexmedetomidine infusion                                                                                                                                                                | Hypothermia and bradycardia – at 0.4mcg/kg/h dose reduced and maintained on 0.2 mcg/kg/h without further adverse events                          |
| O'Mara 2009 [16] USA   | 24 week GA, 9d old infant on high frequency oscillatory ventilation.<br>Was on fentanyl and lorazepam<br>Started at 0.5mcg/kg over 10 min followed by 0.25c/kg/h increased by 0.05-0.1mcg/kg/h every 12 h if needed. Max rate of 0.7mcg/kg/h for 19 days. | Calmed and remained sedated<br>Allowed weaning of ventilation and extubation                                                                     |
| Kubota 2012 [27] Japan | Term infant - ventilated                                                                                                                                                                                                                                  | EEG confirmed seizures, stopped 12h after discontinuation of dexmedetomidine infusion without any antiepileptic medication<br>Normal development |

**Table 4. Clinical studies of use of dexmedetomidine in infants undergoing therapeutic hypothermia for HIE**

| Study ID Setting | Study design | Inclusion criteria | Dexmedetomidine group | Comparator | Outcomes Notes |
|------------------|--------------|--------------------|-----------------------|------------|----------------|
|------------------|--------------|--------------------|-----------------------|------------|----------------|

1  
2  
3  
4  
5  
6  
7  
8  
9  
10  
11  
12  
13  
14  
15  
16  
17  
18  
19  
20  
21  
22  
23  
24  
25  
26  
27  
28  
29  
30  
31  
32  
33  
34  
35  
36  
37  
38  
39  
40  
41  
42  
43  
44  
45  
46

|                                                                 |                                                            |                                                               |                                                                                                                                                                                                                        |                                                                                      |                                                                                                                                                                                                                                                                                                                                                                                                                                                                           |
|-----------------------------------------------------------------|------------------------------------------------------------|---------------------------------------------------------------|------------------------------------------------------------------------------------------------------------------------------------------------------------------------------------------------------------------------|--------------------------------------------------------------------------------------|---------------------------------------------------------------------------------------------------------------------------------------------------------------------------------------------------------------------------------------------------------------------------------------------------------------------------------------------------------------------------------------------------------------------------------------------------------------------------|
| <p>O'Mara 2018 [33]<br/>USA<br/>Single centre</p>               | <p>Retrospective cohort study<br/>Jul 2013 to Oct 2016</p> | <p>HIE requiring TH<br/>Received dexmedetomidine for 48 h</p> | <p>N= 19<br/>2, dexmedetomidine only; 17, combination with fentanyl</p>                                                                                                                                                | <p>No comparator</p>                                                                 | <p>Fentanyl weaned down in 13/17 after starting dexmedetomidine<br/><br/>10 infants required inotropes. Initiation of dexmedetomidine did not affect HR, or BP. One infant had bradycardia – resolved with discontinuation of fentanyl<br/><br/>Clinical outcomes: 1 died; 8 had seizures</p>                                                                                                                                                                             |
| <p>Cosnahan 2021 [19]<br/>USA<br/>single centre</p>             | <p>Retrospective cohort study<br/>Jan 2018 to Apr 2020</p> | <p>HIE requiring TH (NICHD criteria)</p>                      | <p>Mar 2019-Apr2020<br/>N= 34<br/><br/>Continuous dexmedetomidine<br/>0.3 mcg/kg/h with increments of 0.1 mcg/kg/hr based on pain scores and breakthrough morphine dose requirements<br/><br/>Maximum: 2 mcg/kg/hr</p> | <p>Jan 2018-Mar 2019<br/>N= 36<br/><br/>Intermittent morphine 0.1 mg/kg every 4h</p> | <p>No difference in N-PASS scores<br/>Dexmedetomidine group had:<br/>- Higher breakthrough morphine requirement: 0.13 (0.13) vs 0.04 (0.09) mg/kg, p = 0.001<br/>- Lower total morphine requirement: 0.13 (0.13) vs 1.79 (0.23) mg/kg, p &lt; 0.0001<br/>- Reduced respiratory support requirement<br/>- Similar outcomes for feeding, EEG and MRI scan<br/><br/>All HR measurement in normal range<br/><br/>- morphine group had higher HR and BP at some timepoints</p> |
| <p>Elliot 2022 [32] abstract only<br/>USA<br/>Single centre</p> | <p>Retrospective cohort<br/><br/>2011-2019</p>             | <p>Dexmed and/or fentanyl</p>                                 | <p>Dexmed = 46 (14 monotherapy; 32 in combination)</p>                                                                                                                                                                 | <p>Fentanyl = 120</p>                                                                | <p>Dexmedetomidine group had lower HR: 91 ± 9 vs. 103 ± 11 bpm<br/><br/>Dexmedetomidine was reduced or discontinued in 22 (48%) due to inadequate sedation with low HR</p>                                                                                                                                                                                                                                                                                                |

**Table 5. Dose of dexmedetomidine in newborn infants**

| Study ID                                                                   |                    | Bolus at start of infusion                | Infusion             |                                                                    |                  |                                                                                                                                 |
|----------------------------------------------------------------------------|--------------------|-------------------------------------------|----------------------|--------------------------------------------------------------------|------------------|---------------------------------------------------------------------------------------------------------------------------------|
|                                                                            |                    |                                           | Starting dose        | Increments                                                         | Range / maximum  | Weaning                                                                                                                         |
| O'Mara 2012 [28]                                                           |                    | 0.5 mcg/kg                                | 0.3 mcg/kg/h         | 0.1 mcg/kg/hr twice daily if need for >3 doses of adjunct sedation | 0.3-1.2 mcg/kg/h | 0.1mcg/kg/h every 12 -24 hours                                                                                                  |
| Morton 2021 [31]                                                           |                    | -                                         | 0.5 mcg/kg           | 0.1 to 0.2 mcg/kg/h not more frequently than every 30 min          | 2 mcg/kg/h       | No specific regimen given                                                                                                       |
| Estkowski 2015 [21]                                                        |                    | -                                         |                      |                                                                    |                  |                                                                                                                                 |
| Dersch-Mills 2019 [30]                                                     |                    | -                                         | 0.2-0.3 mcg/kg/hr    | 0.1 mcg/kg/h based on pain and sedation scores                     | 0.5 mcg/kg/h     | No regimen specified – weaned over median of 79 hrs (IQR, 35-175). 10 infants needed clonidine (9 had dexmedetomidine for >10d) |
| Australasian Neonatal Medicines Formulary [35]                             | <37 weeks' GA      | 0.2 mcg/kg                                | 0.2 mcg/kg/h         | 0.1 to 0.2 mcg/kg/h every 30 min                                   | 1 mcg/kg/h       | 0.1 mcg/kg/h every 30 min<br>OR<br>0.2 mcg/kg/h every 8 h                                                                       |
|                                                                            | Term infant ≤ 14 d | 0.35 mcg/kg                               | 0.3 mcg/kg/h         |                                                                    | 1.2 mcg/kg/h     |                                                                                                                                 |
|                                                                            | Term infant > 14 d | 0.5 mcg/kg                                | 0.5 to 0.75 mcg/kg/h |                                                                    | 1.5 mcg/kg/h     |                                                                                                                                 |
| Neonatal Drug Dosing Guideline, IWK Health Centre (personal communication) |                    | 0.5 to 1 mcg/kg<br>“not usually required” | 0.1 to 0.3 mcg/kg/h  | 0.1 cmg/kg/h every 1 to 2 h                                        | 1 mcg/kg/h       | 0.1 mcg/kg/h every 12 to 24 h as tolerated                                                                                      |



**Table 6. Registered clinical trials**

| Study ID                                                                                                                             | Study design                                                                                | Eligibility                                                                                                                                                                                                                                                                                                                                        | Intervention                                                                                      | Comparator                                                                                                         | Outcomes                                                                                                                                                                                |
|--------------------------------------------------------------------------------------------------------------------------------------|---------------------------------------------------------------------------------------------|----------------------------------------------------------------------------------------------------------------------------------------------------------------------------------------------------------------------------------------------------------------------------------------------------------------------------------------------------|---------------------------------------------------------------------------------------------------|--------------------------------------------------------------------------------------------------------------------|-----------------------------------------------------------------------------------------------------------------------------------------------------------------------------------------|
| Dexmedetomidine for LISA Procedure in preterm infants (DEXLISA)<br><a href="#">NCT04820101</a>                                       | Single group assignment<br>Open label<br>Sample size = 40                                   | Inclusion Criteria:<br>- GA 26-36 weeks'<br>- Respiratory distress syndrome requiring surfactant therapy<br>Exclusion Criteria:<br>- Need for emergency intubation in the delivery room<br>- Major congenital malformations or chromosomal anomaly abnormalities<br>- Fetal Hydrops<br>- Hypercapnia<br>- Pneumothorax<br>- Hemodynamic compromise | Dexmedetomidine 1 mcg/kg slowly IV over 10 minutes                                                | None                                                                                                               | Change in Neonatal Infants Pain Scale score before, during and immediately after the procedure<br>In 24 h,<br>- Number of apnoea<br>- Number of severe apnoea<br>- Need for ventilation |
| Dexmedetomidine use in infants undergoing cooling due to neonatal encephalopathy (DICE) Trial<br><a href="#">NCT04772222</a><br>[36] | Randomised controlled trial<br>Parallel<br>1:1 allocation<br>Open label<br>Sample size = 50 | -≥36 weeks' GA with HIE treated with TH.<br>-requiring sedation and/or treatment to prevent shivering during TH as assessed by the Neonatal Pain, Agitation, and Sedation Scale (N-PASS) scores and a                                                                                                                                              | Dexmedetomidine<br>- Loading dose of 1 mcg/kg followed by 0.1 to 0.5 mcg/kg/h continuous infusion | Morphine<br>- Intermittent dosing every 3-4 h of 0.02-0.05 mg/kg/dose or continuous infusion of 0.005-0.01 mg/kg/h | Safety – potential adverse events such as hypotension, hypertension, bradycardia, cardiac arrhythmias, hypothermia, acute renal failure, liver failure, seizures<br><br>Shivering       |

|  |  |                                                    |  |  |                                                                                                                       |
|--|--|----------------------------------------------------|--|--|-----------------------------------------------------------------------------------------------------------------------|
|  |  | modified Bedside<br>Shivering Assessment<br>Scale. |  |  | Days to full oral feeding<br>Mother assessment at<br>7d, 3-4 mo<br>Neurological<br>assessment at 3-4 mo<br>and 6-9 mo |
|--|--|----------------------------------------------------|--|--|-----------------------------------------------------------------------------------------------------------------------|

Confidential: For Review Only

1  
2  
3  
4  
5  
6  
7  
8  
9  
10  
11  
12  
13  
14  
15  
16  
17  
18  
19  
20  
21  
22  
23  
24  
25  
26  
27  
28  
29  
30  
31  
32  
33  
34  
35  
36  
37  
38  
39  
40  
41  
42  
43  
44  
45  
46

## References

- 1 Sand L, Szatkowski L, Kwok TC, *et al.* Observational cohort study of changing trends in non-invasive ventilation in very preterm infants and associations with clinical outcomes. *Arch Dis Child Fetal Neonatal Ed* 2021;:fetalneonatal-2021-322390. doi:10.1136/archdischild-2021-322390
- 2 Bellù R, Romantsik O, Nava C, *et al.* Opioids for newborn infants receiving mechanical ventilation. *Cochrane Database Syst Rev* 2021;3:CD013732. doi:10.1002/14651858.CD013732.pub2
- 3 COMMITTEE ON FETUS AND NEWBORN and SECTION ON ANESTHESIOLOGY AND PAIN MEDICINE, Keels E, Sethna N, *et al.* Prevention and Management of Procedural Pain in the Neonate: An Update. *Pediatrics* 2016;137:e20154271. doi:10.1542/peds.2015-4271
- 4 Anand KJ. Clinical importance of pain and stress in preterm neonates. *Biol Neonate* 1998;73:1–9. doi:10.1159/000013953
- 5 Anand KJ, Sippell WG, Aynsley-Green A. Randomised trial of fentanyl anaesthesia in preterm babies undergoing surgery: effects on the stress response. *Lancet* 1987;1:243–8. doi:10.1016/s0140-6736(87)90065-1
- 6 McPherson C, Miller SP, El-Dib M, *et al.* The influence of pain, agitation, and their management on the immature brain. *Pediatr Res* 2020;88:168–75. doi:10.1038/s41390-019-0744-6
- 7 Carbajal R, Eriksson M, Courtois E, *et al.* Sedation and analgesia practices in neonatal intensive care units (EUROPAIN): results from a prospective cohort study. *Lancet Respir Med* 2015;3:796–812. doi:10.1016/S2213-2600(15)00331-8
- 8 Zimmerman KO, Smith PB, Benjamin DK, *et al.* Sedation, Analgesia, and Paralysis during Mechanical Ventilation of Premature Infants. *J Pediatr* 2017;180:99-104.e1. doi:10.1016/j.jpeds.2016.07.001
- 9 Ancora G, Lago P, Garetti E, *et al.* Evidence-based clinical guidelines on analgesia and sedation in newborn infants undergoing assisted ventilation and endotracheal intubation. *Acta Paediatr* 2019;108:208–17. doi:10.1111/apa.14606
- 10 Ancora G, Lago P, Garetti E, *et al.* Efficacy and safety of continuous infusion of fentanyl for pain control in preterm newborns on mechanical ventilation. *J Pediatr* 2013;163:645-651.e1. doi:10.1016/j.jpeds.2013.02.039
- 11 MacGregor R, Evans D, Sugden D, *et al.* Outcome at 5-6 years of prematurely born children who received morphine as neonates. *Arch Dis Child Fetal Neonatal Ed* 1998;79:F40-43. doi:10.1136/fn.79.1.f40
- 12 Puia-Dumitrescu M, Comstock BA, Li S, *et al.* Assessment of 2-Year Neurodevelopmental Outcomes in Extremely Preterm Infants Receiving Opioids and Benzodiazepines. *JAMA Netw Open* 2021;4:e2115998. doi:10.1001/jamanetworkopen.2021.15998

- 13 Al-Turkait A, Szatkowski L, Choonara I, *et al.* Drug utilisation in neonatal units in England and Wales: a national cohort study. *Eur J Clin Pharmacol* Published Online First: 13 January 2022. doi:10.1007/s00228-021-03267-x
- 14 van Dijkman SC, De Cock PAJG, Smets K, *et al.* Dose rationale and pharmacokinetics of dexmedetomidine in mechanically ventilated new-borns: impact of design optimisation. *Eur J Clin Pharmacol* 2019;**75**:1393–404. doi:10.1007/s00228-019-02708-y
- 15 European Medicines Agency. Dexmedetomidine Accord. 2022. <https://www.ema.europa.eu/en/medicines/human/EPAR/dexmedetomidine-accord#authorisation-details-section> (accessed 11 Feb 2022).
- 16 O'Mara K, Gal P, Ransom JL, *et al.* Successful Use of Dexmedetomidine for Sedation in a 24-Week Gestational Age Neonate. *Ann Pharmacother* 2009;**43**:1707–13. doi:10.1345/aph.1M245
- 17 Mahmoud M, Barbi E, Mason KP. Dexmedetomidine: What's New for Pediatrics? A Narrative Review. *JCM* 2020;**9**:2724. doi:10.3390/jcm9092724
- 18 Schoeler M, Loetscher PD, Rossaint R, *et al.* Dexmedetomidine is neuroprotective in an in vitro model for traumatic brain injury. *BMC Neurol* 2012;**12**:20. doi:10.1186/1471-2377-12-20
- 19 Cosnahan AS, Angert RM, Jano E, *et al.* Dexmedetomidine versus intermittent morphine for sedation of neonates with encephalopathy undergoing therapeutic hypothermia. *J Perinatol* 2021;**41**:2284–91. doi:10.1038/s41372-021-00998-8
- 20 Ezzati M, Kawano G, Rocha-Ferreira E, *et al.* Dexmedetomidine Combined with Therapeutic Hypothermia Is Associated with Cardiovascular Instability and Neurotoxicity in a Piglet Model of Perinatal Asphyxia. *Dev Neurosci* 2017;**39**:156–70. doi:10.1159/000458438
- 21 Estkowski LM, Morris JL, Sinclair EA. Characterization of Dexmedetomidine Dosing and Safety in Neonates and Infants. *The Journal of Pediatric Pharmacology and Therapeutics* 2015;**20**:112–8. doi:10.5863/1551-6776-20.2.112
- 22 Potts AL, Anderson BJ, Warman GR, *et al.* Dexmedetomidine pharmacokinetics in pediatric intensive care--a pooled analysis. *Paediatr Anaesth* 2009;**19**:1119–29. doi:10.1111/j.1460-9592.2009.03133.x
- 23 *BNF FOR CHILDREN (BNFC) 2020-2021*. S.I.: : PHARMACEUTICAL PRESS 2020.
- 24 Chrysostomou C, Schulman SR, Herrera Castellanos M, *et al.* A Phase II/III, Multicenter, Safety, Efficacy, and Pharmacokinetic Study of Dexmedetomidine in Preterm and Term Neonates. *The Journal of Pediatrics* 2014;**164**:276-282.e3. doi:10.1016/j.jpeds.2013.10.002
- 25 McAdams RM, Pak D, Lalovic B, *et al.* Dexmedetomidine Pharmacokinetics in Neonates with Hypoxic-Ischemic Encephalopathy Receiving Hypothermia. *Anesthesiology Research and Practice* 2020;**2020**:1–15. doi:10.1155/2020/2582965
- 26 Finkel JC, Quezado ZMN. Hypothermia-induced bradycardia in a neonate receiving dexmedetomidine. *J Clin Anesth* 2007;**19**:290–2. doi:10.1016/j.jclinane.2006.08.011

- 1  
2  
3 27 Kubota T, Fukasawa T, Kitamura E, *et al.* Epileptic seizures induced by  
4 dexmedetomidine in a neonate. *Brain and Development* 2013;**35**:360–2.  
5 doi:10.1016/j.braindev.2012.05.011  
6
- 7 28 O'Mara K, Gal P, Wimmer J, *et al.* Dexmedetomidine Versus Standard Therapy with  
8 Fentanyl for Sedation in Mechanically Ventilated Premature Neonates. *The Journal of*  
9 *Pediatric Pharmacology and Therapeutics* 2012;**17**:252–62. doi:10.5863/1551-6776-  
10 17.3.252  
11
- 12 29 Sellas MN, Kyllonen KC, Lepak MR, *et al.* Dexmedetomidine for the Management of  
13 Postoperative Pain and Sedation in Newborns. *The Journal of Pediatric Pharmacology*  
14 *and Therapeutics* 2019;**24**:227–33. doi:10.5863/1551-6776-24.3.227  
15
- 16 30 Dersch-Mills DA, Banasch HL, Yusuf K, *et al.* Dexmedetomidine Use in a Tertiary Care  
17 NICU: A Descriptive Study. *Ann Pharmacother* 2019;**53**:464–70.  
18 doi:10.1177/1060028018812089  
19
- 20 31 Morton SU, Labrecque M, Moline M, *et al.* Reducing Benzodiazepine Exposure by  
21 Instituting a Guideline for Dexmedetomidine Usage in the NICU. *Pediatrics*  
22 2021;**148**:e2020041566. doi:10.1542/peds.2020-041566  
23
- 24 32 Elliott M, Burnsed J, Heinan K, *et al.* Effect of dexmedetomidine on heart rate in  
25 neonates with hypoxic ischemic encephalopathy undergoing therapeutic hypothermia. *J*  
26 *Neonatal Perinatal Med* 2022;**15**:47–54. doi:10.3233/NPM-210737  
27
- 28 33 O'Mara K, Weiss M. Dexmedetomidine for Sedation of Neonates with HIE Undergoing  
29 Therapeutic Hypothermia: A Single-Center Experience. *AJP Rep* 2018;**08**:e168–73.  
30 doi:10.1055/s-0038-1669938  
31
- 32 34 Ibrahim M, Jones LJ, Lai NM, *et al.* Dexmedetomidine for analgesia and sedation in  
33 newborn infants receiving mechanical ventilation. *Cochrane Database of Systematic*  
34 *Reviews* Published Online First: 17 September 2016. doi:10.1002/14651858.CD012361  
35
- 36 35 Australasian Neonatal Medicines Formulary. Dexmedetomidine: neowborn use only.  
37 2021. [https://www.anmfonline.org/wp-content/uploads/2021/06/dexmedetomidine-](https://www.anmfonline.org/wp-content/uploads/2021/06/dexmedetomidine-18022021-2.0.pdf)  
38 [18022021-2.0.pdf](https://www.anmfonline.org/wp-content/uploads/2021/06/dexmedetomidine-18022021-2.0.pdf)  
39
- 40 36 Baserga M, DuPont TL, Ostrander B, *et al.* Dexmedetomidine Use in Infants Undergoing  
41 Cooling Due to Neonatal Encephalopathy (DICE Trial): A Randomized Controlled Trial:  
42 Background, Aims and Study Protocol. *Front Pain Res* 2021;**2**:770511.  
43 doi:10.3389/fpain.2021.770511  
44  
45  
46  
47  
48  
49  
50  
51  
52  
53  
54  
55  
56  
57  
58  
59  
60

# BMJ Paediatrics Open

## **Sedation and analgesia from prolonged pain and stress during mechanical ventilation in preterm infants: Is dexmedetomidine an alternative to current practice?**

|                               |                                                                                                                                                                                                                                                                                                                                                                |
|-------------------------------|----------------------------------------------------------------------------------------------------------------------------------------------------------------------------------------------------------------------------------------------------------------------------------------------------------------------------------------------------------------|
| Journal:                      | <i>BMJ Paediatrics Open</i>                                                                                                                                                                                                                                                                                                                                    |
| Manuscript ID                 | bmjpo-2022-001460.R1                                                                                                                                                                                                                                                                                                                                           |
| Article Type:                 | Review                                                                                                                                                                                                                                                                                                                                                         |
| Date Submitted by the Author: | 20-Apr-2022                                                                                                                                                                                                                                                                                                                                                    |
| Complete List of Authors:     | Ojha, Shalini; University of Nottingham, School of Medicine; University Hospitals of Derby and Burton NHS Foundation Trust, Neonatal Unit<br>Abramson, Janine; University of Nottingham School of Health Sciences, Division of Medical Sciences and GEM<br>Dorling, Jon; University Hospital Southampton NHS Foundation Trust, Department of Neonatal Medicine |
| Keywords:                     | Neonatology, Pain, Pharmacology, Therapeutics                                                                                                                                                                                                                                                                                                                  |
|                               |                                                                                                                                                                                                                                                                                                                                                                |

SCHOLARONE™  
Manuscripts



I, the Submitting Author has the right to grant and does grant on behalf of all authors of the Work (as defined in the below author licence), an exclusive licence and/or a non-exclusive licence for contributions from authors who are: i) UK Crown employees; ii) where BMJ has agreed a CC-BY licence shall apply, and/or iii) in accordance with the terms applicable for US Federal Government officers or employees acting as part of their official duties; on a worldwide, perpetual, irrevocable, royalty-free basis to BMJ Publishing Group Ltd ("BMJ") its licensees and where the relevant Journal is co-owned by BMJ to the co-owners of the Journal, to publish the Work in this journal and any other BMJ products and to exploit all rights, as set out in our [licence](#).

The Submitting Author accepts and understands that any supply made under these terms is made by BMJ to the Submitting Author unless you are acting as an employee on behalf of your employer or a postgraduate student of an affiliated institution which is paying any applicable article publishing charge ("APC") for Open Access articles. Where the Submitting Author wishes to make the Work available on an Open Access basis (and intends to pay the relevant APC), the terms of reuse of such Open Access shall be governed by a Creative Commons licence – details of these licences and which [Creative Commons](#) licence will apply to this Work are set out in our licence referred to above.

Other than as permitted in any relevant BMJ Author's Self Archiving Policies, I confirm this Work has not been accepted for publication elsewhere, is not being considered for publication elsewhere and does not duplicate material already published. I confirm all authors consent to publication of this Work and authorise the granting of this licence.

1  
2  
3  
4 **Title: Sedation and analgesia from prolonged pain and stress during mechanical**  
5  
6 **ventilation in preterm infants: Is dexmedetomidine an alternative to current practice?**  
7  
8  
9

10  
11  
12 **Authors**  
13

14  
15  
16 1. Shalini Ojha

17 [shalini.ojha@nottingham.ac.uk](mailto:shalini.ojha@nottingham.ac.uk)

18  
19 Academic Unit of Lifespan and Population Health, School of Medicine, University of  
20 Nottingham, Nottingham, UK and Neonatal Unit, University Hospitals of Derby and  
21 Burton NHS Trust, Derby, UK  
22  
23  
24

25  
26 2. Janine Abramson

27 [Janine.abramson@nottingham.ac.uk](mailto:Janine.abramson@nottingham.ac.uk)

28  
29 Academic Unit of Lifespan and Population Health, School of Medicine, University of  
30 Nottingham, Nottingham, UK  
31  
32  
33

34  
35 3. Jon Dorling

36 [Jon.dorling@uhs.nhs.uk](mailto:Jon.dorling@uhs.nhs.uk)

37  
38 Neonatal Intensive Care Unit, University Hospitals of Southampton, Southampton,  
39  
40 UK  
41  
42  
43

44 **Corresponding author:** Dr Shalini Ojha, Academic Unit of Lifespan and Population Health,  
45 School of Medicine, University of Nottingham. Room 4117, Medical School Building, Royal  
46 Derby Hospital, Derby DE22 3NE; email: [shalini.ojha@nottingham.ac.uk](mailto:shalini.ojha@nottingham.ac.uk)  
47  
48  
49

50  
51 **Orchid ID:** <https://orcid.org/0000-0001-5668-4227>  
52  
53

54 **Short title:** Dexmedetomidine in newborn infants  
55

56  
57 **Funding Support:** The authors did not receive any external funding.  
58  
59  
60



### Patient and Public Involvement statement

How was the development of the research question and outcome measures informed by patients' priorities, experience, and preferences?

- N/A

How did you involve patients in the design of this study?

- N/A

Were patients involved in the recruitment to and conduct of the study?

- There was no direct patient involvement.

How will the results be disseminated to study participants?

- The results of the study will be communicated via Bliss, UK's largest charity for sick and preterm infants, and via social media accounts of the authors and their institutions.

For randomised controlled trials, was the burden of the intervention assessed by patients themselves?

- N/A

Patient advisers should also be thanked in the contributorship statement/acknowledgements.

- N/A

**Word count: 3172**

**Number of tables: 5**

**Number of figures: 0**

### Contributors' statement

SO and JD conceived the piece. SO led the write up. JA conducted the literature search and completed the study summaries. SO, JD, and JA revised and approved the final manuscript.

All authors approved the final manuscript as submitted and agree to be accountable for all aspects of the work.

**Conflict of Interest Disclosures and funding sources:** Shalini Ojha has received funds from the National Institute of Health Research, UK and the Medical Research Council, UK for other research. Jon Dorling has received funds from the National Institute of Health Research, UK, Canadian Institute for Health Research, Canada, Nova Scotia Research, Canada and Action Medical Research, UK for other research. The authors have no other conflicts of interest relevant to this article to disclose.

**Abstract** (292/300 words)

Mechanical ventilation is an uncomfortable and potentially painful intervention. Opioids, such as morphine and fentanyl are used for analgesia and sedation but there is uncertainty whether they reduce pain in mechanically ventilated infants. Moreover, there may be short and long-term adverse consequences such as respiratory depression leading to prolonged mechanical ventilation and detrimental long-term neurodevelopmental effects. Despite this, opioids are widely used, possibly due to a lack of alternatives.

Dexmedetomidine, a highly selective alpha-2-adrenergic agonist with analgesic and sedative effects, currently approved for adults, has come into use in newborn infants. It provides analgesia and simulates natural sleep with maintenance of spontaneous breathing and upper airway tone. Although data on pharmacokinetics-pharmacodynamics in preterm infants are scant, observational studies report that using dexmedetomidine in conjunction with opioids/benzodiazepines or on its own can reduce the cumulative exposure to opioids/benzodiazepines. As it does not cause respiratory depression, dexmedetomidine could enable quicker weaning and extubation. Dexmedetomidine has also been suggested as an adjunct to therapeutic hypothermia in hypoxic ischaemic encephalopathy and others have used it during painful procedures and surgery. Dexmedetomidine infusion can cause bradycardia and hypotension although most report clinically insignificant effects.

The increasing number of publications of observational studies and clinical use demonstrates that dexmedetomidine is being used in newborn infants but data on safety and efficacy are scant and not of high-quality. Importantly, there are no data on long term neurodevelopmental impact on preterm or term-born infants. The acceptance of dexmedetomidine in routine clinical practice must be preceded by clinical evidence. We need adequately powered and well-designed randomised controlled trials investigating whether dexmedetomidine alone or with opioids/benzodiazepines in infants on mechanical

1  
2  
3 ventilation reduces the need for opioids/benzodiazepine and improves neurodevelopment at  
4  
5 24 months and later as compared to the use of opioids/benzodiazepines alone.  
6  
7  
8  
9  
10  
11  
12  
13  
14  
15  
16  
17  
18  
19  
20  
21  
22  
23  
24  
25  
26  
27  
28  
29  
30  
31  
32  
33  
34  
35  
36  
37  
38  
39  
40  
41  
42  
43  
44  
45  
46  
47  
48  
49  
50  
51  
52  
53  
54  
55  
56  
57  
58  
59  
60

Confidential: For Review Only

1  
2  
3 **Keywords:** infant, preterm; dexmedetomidine, mechanical ventilation  
4  
5  
6  
7  
8

9 **Abbreviations:** BP, blood pressure; GA, gestational age; HIE, hypoxic-ischaemic  
10 encephalopathy; HR, heart rate; IQR, inter-quartile range; IVH, intraventricular haemorrhage;  
11 LD, loading dose; MD, maintenance dose; NEC, necrotising enterocolitis; NICU, neonatal  
12 intensive care unit; PD, pharmacodynamics; PK, pharmacokinetics; PMA, post-menstrual  
13 age; TH, therapeutic hypothermia  
14  
15  
16  
17  
18  
19  
20  
21  
22  
23  
24  
25  
26  
27  
28  
29  
30  
31  
32  
33  
34  
35  
36  
37  
38  
39  
40  
41  
42  
43  
44  
45  
46  
47  
48  
49  
50  
51  
52  
53  
54  
55  
56  
57  
58  
59  
60

## Key Messages

- Mechanical ventilation is a potentially painful intervention. Opioids and benzodiazepines are widely used to provide analgesia and sedation in mechanically ventilated infants.
- Evidence suggests that opioids may be ineffective analgesics and there may be adverse consequences such as respiratory depression and detrimental long-term neurodevelopmental effects.
- Dexmedetomidine, a highly selective alpha-2-adrenergic agonist provides analgesia and simulates natural sleep with maintenance of spontaneous breathing and upper airway tone.
- Emerging observational studies suggest that dexmedetomidine use in mechanically ventilated infants may reduce exposure to opioids/benzodiazepines and enable quicker weaning and extubation.
- Data on safety and efficacy are scant. Adequately powered randomised controlled trials investigating use of dexmedetomidine in preterm infants are required.

## Introduction

Mechanical ventilation via a tracheal tube is widely used for respiratory support in preterm infants. In England and Wales, despite the increase in use of non-invasive respiratory support, 57% of very preterm infants were mechanically ventilated on the day of birth and many others require ventilatory support later in the course of their care [1]. This included 91% of extremely preterm infants and the increasing survival of those born at these gestations could lead to further increases in the use of mechanical ventilation in neonatal care.

It is now well accepted that preterm infants perceive pain. Mechanical ventilation is an uncomfortable and painful intervention. Ventilated infants are, often, also subjected to multiple painful procedures and experience pain caused by underlying diseases such as necrotising enterocolitis (NEC) [2,3]. Pain and stress cause cardiorespiratory instability including interference with the ventilator synchronising with the infant's breathing efforts that lead to suboptimal ventilation, fluctuations in heart rate (HR), respiratory rate, blood pressure (BP), and oxygen saturation with complications such as intraventricular haemorrhages (IVH) and metabolic instability [4].

## Pain in preterm infants

Preterm infants have enhanced hormonal and physiological responses to pain. In 1987, Anand et al., showed that preterm infants undergoing patent ductus arteriosus surgery who did not receive fentanyl had a significantly higher hormonal stress response compared to those who received fentanyl [5]. More recently, magnetic resonance imaging studies identified that exposure to pain and stress in neonatal care alters corticospinal tract, and subcortical white matter development with further evidence of reduced volume of the somatosensory thalamus and changes in the cortex, limbic system and basal ganglia, and the white matter that persist into school age [6].

1  
2  
3 Management of pain and agitation is fundamental to good intensive care, yet neonatal pain  
4 is inconsistently assessed and inadequately managed [3]. A prospective cohort study of 243  
5 European neonatal intensive care units (NICUs), the European Pain Audit in Neonates  
6 (EUROPAIN), reported 34% of admissions, including 82% of those who were mechanically  
7 ventilated, received some sedation or analgesia [7]. A retrospective cohort study from 348  
8  
9  
10  
11  
12  
13  
14  
15  
16  
17  
18  
19  
20  
21  
22  
23  
24  
25  
26  
27  
28  
29  
30  
31  
32  
33  
34  
35  
36  
37  
38  
39  
40  
41  
42  
43  
44  
45  
46  
47  
48  
49  
50  
51  
52  
53  
54  
55  
56  
57  
58  
59  
60  
Pediatrics Medical Group NICUs in the USA found that infants received a sedative, analgesic  
or paralytic only on 33% of days that they were mechanically ventilated [8].

Although optimal management of pain and sedation during mechanical ventilation is as yet  
undiscovered, selective use of continuous infusion of opioids is recommended for infants  
who are mechanically ventilated for prolonged periods [3,9]. These recommendations stand  
despite the 2021 update of the Cochrane review that concluded that there is uncertainty  
whether opioids have any effect on reducing pain in mechanically ventilated infants [2]. In  
addition, there may be short and long-term adverse consequences of morphine infusion in  
preterm infants such as respiratory depression leading to prolonged duration of mechanical  
ventilation and detrimental long-term neurodevelopmental effects. The Cochrane systematic  
review [2] includes one trial that reported neurodevelopment at 18-24 months: Ancora 2013  
[10] (RR 2.00, 95% CI 0.39 to 10.29; 78 participants); and one study that reported  
neurodevelopment outcomes at 5-6 years of age [11]: MacGregor 1998 (RR 1.60, 95% CI  
0.56 to 4.56; 95 participants) and concluded the evidence was uncertain. Puia-Dumitrescu et  
al., [12], performed a post-hoc analysis of infants who participated in the Preterm  
Erythropoietin Neuroprotection Trial to investigate the effect of exposure to opioids and  
benzodiazepines on development at 22-26 months' corrected age. Of the 936 extremely  
preterm infants 481 (51%) received opioids; 297 (32%) received both opioids and  
benzodiazepines; and 20 (2%) received benzodiazepines only. Infants exposed to both  
groups of drugs had more co-morbidities compared to those exposed to only one or none  
with higher adjusted odds of IVH, NEC, severe bronchopulmonary dysplasia, and  
retinopathy of prematurity, and longer length of hospital stay. Outcomes at 2-years were



1  
2  
3 negatively associated with the combined use of opioids and benzodiazepines even after  
4 adjusting for potential confounders. The lowest scores were noted among the infants who  
5 received the drugs for more than 7 days (median (IQR) score of 85 (73-97)) compared to 97  
6 (91-107) in infants with no exposure. However, this was not a randomised allocation and the  
7 higher prevalence of multiple co-morbidities in the group that received drugs makes it difficult  
8 to interpret the results.  
9  
10  
11  
12  
13  
14

15  
16 Despite these uncertainties, opioids are the most popular choice for management of pain  
17 and sedation in mechanically ventilated infants. Of the 2142 mechanically ventilated infants  
18 included in the EUROPAIN audit, morphine and fentanyl were given to 923 (43%) and 639  
19 (29%) infants, respectively, while 536 (25%) received midazolam [7]. Zimmerman et al.  
20 similarly reported that in 433,587 ventilated-days, fentanyl (17%), midazolam (14%) and  
21 morphine (9%) were the most frequently administered drugs [8]. They also reported increase  
22 in administration of opioids during mechanical ventilation from 5% of ventilated days in 1997  
23 to 32% in 2012. In the UK, the percentage of very preterm infants who receive intravenous  
24 morphine increased from 32% in 2010 to 37% in 2017 [13].  
25  
26  
27  
28  
29  
30  
31  
32  
33  
34  
35

### 36 **Dexmedetomidine: an alternative agent for pain and sedation in newborn infants**

37  
38 This high use of opioids despite the uncertainty about benefit and harm is possibly due to a  
39 lack of alternative agents that could provide adequate and safe sedation and analgesia in  
40 newborn infants. Recently, dexmedetomidine, a highly selective alpha-2-adrenergic agonist  
41 (1620:1:: $\alpha$ 2: $\alpha$ 1 specificity) with sedative and analgesic effects has come into use in newborn  
42 infants receiving mechanical ventilation [14]. Several recent studies have explored the off-  
43 label use of dexmedetomidine in newborn infants for sedation and analgesia in NICU  
44 settings. A summary of the studies is given in Tables 1-4.  
45  
46  
47  
48  
49  
50  
51  
52  
53  
54

55  
56 Dexmedetomidine, first approved by the USA Food and Drug Administration in 1999 is  
57 similarly authorised by the European Medicine Agency [15] for use for sedation in adult  
58 intensive care unit patients requiring sedation level no deeper than arousal in response to  
59  
60

1  
2  
3 verbal stimulation and for sedation of non-intubated patients before and/or during diagnostic  
4 or surgical procedures requiring sedation. It provides analgesia via inhibition of substance P  
5 release from the dorsal horns of the spinal cord while the anxiolysis and sedation are  
6  
7 believed to be due to the reduction in sympathetic outflow from the locus coeruleus [16]. It  
8  
9 stimulates the natural sleep pathways and induces activity similar to non-REM sleep in  
10  
11 adults and children [17]. The effects on respiration and airway also mimic natural sleep and  
12  
13 therefore maintain spontaneous breathing and upper airway tone [17].  
14  
15  
16  
17  
18

19 Although there are no data to examine the early exposure to dexmedetomidine and long-  
20  
21 term neurocognitive function in children, animal studies suggest that dexmedetomidine may  
22  
23 have some neuroprotective effects including cell-protective effects under ischemic conditions  
24  
25 and after traumatic brain injury [18]. In rodents, cortical and white matter loss after hypoxic-  
26  
27 ischaemic injury may be prevented by dexmedetomidine [19]. In another rat model, brain  
28  
29 tissue and cell loss induced by hypoxia-ischaemia were attenuated by dexmedetomidine  
30  
31 post-conditioning, an effect that was inhibited by  $\alpha$ 2-adrenergic antagonists suggesting that  
32  
33 the protective effect was mediated by  $\alpha$ 2-adrenergic receptor activation [20]. However, when  
34  
35 combined with hypothermia, Ezzati et al., found that dexmedetomidine was associated with  
36  
37 adverse cardiovascular events and was neurotoxic following hypoxia-ischaemia [21]. In a  
38  
39 model comparing the effect of ketamine to that of dexmedetomidine on brain cell  
40  
41 degeneration and apoptosis in postnatal day-7 rats, dexmedetomidine produced significant  
42  
43 damage in the primary sensory regions which was different to the limbic injury induced by  
44  
45 ketamine [22]. In ten mechanically ventilated very low birth weight infants born at 25 to 30  
46  
47 weeks' gestational age who received dexmedetomidine infusion (2 to 30 days of postnatal  
48  
49 age), Cortes-Ledesma et al., found that after 6 hours of dexmedetomidine infusion (0.1 to  
50  
51 0.4 mcg/kg/min), brain regional oxygen saturation decreased and fractional oxygen tissue  
52  
53 extraction increased without any change in heart rate, mean blood pressure, oxygen  
54  
55 saturation, or haemoglobin while amplitude integrated EEG showed a prolongation of inter-  
56  
57 burst interval [23]. As the decrease in brain oxygen saturation could not be related to  
58  
59  
60

1  
2  
3 increased brain activity, it suggested a vasoconstrictor effect on cerebral vessels [23].  
4  
5 Currently used sedative and analgesics also adversely impact brain development e.g.,  
6  
7 exposure to midazolam is associated with macro- and microstructural alterations in  
8  
9 hippocampal development and lower cognitive scores [24] while opioid use is linked to  
10  
11 reduced cerebellar volume, poorer cognitive and motor outcomes and behavioural problems  
12  
13 in infancy [6]. No clinical studies have investigated the impact of dexmedetomidine on  
14  
15 neurological outcomes or neurodevelopment in preterm or term-born infants.  
16  
17  
18

### 19 **Pharmacological studies on dexmedetomidine in newborn infants**

20  
21  
22 The evaluation of pharmacokinetics (PK), pharmacodynamics (PD), efficacy and safety of  
23  
24 drugs in vulnerable newborn infants is challenging [24]. Dexmedetomidine is metabolised via  
25  
26 glucuronidation, hydroxylation (via CYP2A6), and N-methylation and primarily eliminated via  
27  
28 the urine [25]. As these pathways, particularly glucuronidation, are immature in the first year  
29  
30 after birth, dexmedetomidine clearance may be decreased but there is a lack of PK-PD  
31  
32 studies in preterm infants [17].  
33  
34

35  
36 The therapeutic window for dexmedetomidine in older children is 0.4 to 0.8 mcg/L (optimum  
37  
38 level around 0.6 mcg/L) [26] with a safety measure of maintaining plasma concentrations  
39  
40 below 1mcg/L and is assumed to be the same in neonatal studies [24]. The clinical  
41  
42 applicability of these serum concentrations is not yet determined and surrogate markers of  
43  
44 efficacy such as pain and sedation scores are used to determine clinical utility and titrate  
45  
46 dosing [27], The drug is available as dexmedetomidine hydrochloride (100 mcg/mL or  
47  
48 4mcg/ml) [28], usually delivered in a concentration of 0.5 to 1 mcg/ml as a loading dose (LD)  
49  
50 over 10-20 min and maintenance dose (MD) as continuous infusion using rate-controlled  
51  
52 syringe pumps. In a phase II/III open-label, safety, efficacy, and PK trial including 11 centres,  
53  
54 Chrysostomou et al., investigated three escalating dose regimens (LD followed by MD) of  
55  
56 dexmedetomidine mechanically ventilated 28-44 weeks' GA infants [29]. In 42 infants (18  
57  
58 preterm and 24 term-born), they found that additional sedation (midazolam) was required  
59  
60

1  
2  
3 only in 4 infants (all term-born) while additional analgesia (fentanyl or morphine) was  
4  
5 required in 17 infants (3 preterms, and 14 term-born). Using the Neonatal Pain and Sedation  
6  
7 Scale (N-PASS), they found that at all three dose levels, infants had signs of pain or  
8  
9 agitation (N-PASS score >3) at 5% time-points only. Preterm infants, as compared to term  
10  
11 infants, had lower weight-adjusted plasma clearance (0.3 vs. 0.9 L/h/Kg) and increased  
12  
13 elimination half-life (7.6 vs. 3.2 h). Van Dijkman et al., performed a dose-finding study of  
14  
15 dexmedetomidine in mechanically ventilated newborn infants who received  
16  
17 dexmedetomidine infusion over 24-hours. Initial dosing (0.3 mcg/kg/h) was determined by  
18  
19 extrapolation of previously published PK of dexmedetomidine in older children and was  
20  
21 subsequently increased to 0.4 mcg/kg/h in the follow-up phase due to higher clearance of  
22  
23 the drug. Additional sedation was required in 83% of the participants as indicated by  
24  
25 Comfort-neo scores. In 7 term infants with HIE and therapeutic hypothermia (TH), McAdams  
26  
27 et al., found that dexmedetomidine clearance was either comparable or lower but volume of  
28  
29 distribution was larger compared to estimates in normothermic infants [30]. They  
30  
31 recommended doses up to 0.4 mcg/kg/h and that a LD may be needed to achieve  
32  
33 therapeutic concentration without a lag. Dose regimens used in published clinical studies of  
34  
35 preterm infants and available neonatal formularies are given in Table 5.  
36  
37  
38  
39

#### 40 **Clinical reports of the use of dexmedetomidine in preterm infants**

41  
42  
43 Case reports of dexmedetomidine use to sedate a difficult to ventilate 24 weeks' gestational  
44  
45 age (GA) infant [16] and others reporting adverse effects [31,32] were followed by larger  
46  
47 single centre studies. Use has been reported in extremely preterm infants in the first weeks  
48  
49 after birth [16,27], in preterm infants at later postmenstrual ages (PMA) and term-born  
50  
51 infants , after surgical procedures [34,35], and in infants undergoing therapeutic  
52  
53 hypothermia (TH) for hypoxic ischaemic encephalopathy (HIE) [19,37,38]. It is also used for  
54  
55 sedation during procedures such as magnetic resonance imaging [39,40]. In an update of  
56  
57 medication prescribing patterns in the US neonatal intensive care units, Stark et al., reported  
58  
59 that between 2010 and 2018, dexmedetomidine was ninth in the list of drugs that had the  
60

1  
2  
3 greatest relative increase in use and had become the 90<sup>th</sup> most frequently prescribed  
4 medication [41] although its use was not reported, at least until 2017, in neonatal care in the  
5 UK [13].  
6  
7  
8  
9

10 Dexmedetomidine is used for sedation and analgesia on its own or in combination with other  
11 agents with the aim of reducing cumulative exposure to opioids and benzodiazepines.  
12

13 Comparing 48 infants with a mean GA of 25 weeks who received either fentanyl or  
14 dexmedetomidine, O'Mara et al., found that the dexmedetomidine group required less  
15 adjunctive sedation [28]. Comparing 39 infants who received dexmedetomidine, (including  
16 28 who concomitantly received opioid infusion) with 39 matched controls who only received  
17 opioids, Sellas et al., found that there was no difference in the duration of use or the number  
18 of doses of opioids but the total dose of opioids received was lower in the group that  
19 received dexmedetomidine [34]. With an aim to reduce benzodiazepine exposure in infants  
20 who were at least 35 weeks' PMA and needed sedation for mechanical ventilation, Morton et  
21 al., implemented a quality improvement project with a sedation guideline recommending the  
22 use of dexmedetomidine as initial agent or in addition to midazolam. They demonstrated  
23 reduction in use of midazolam with fewer infants receiving midazolam, increased midazolam-  
24 free days, and lower daily midazolam doses in those who received additional  
25 dexmedetomidine without any increase in the mean duration of sedation episodes [36]. In 38  
26 infants at a median PMA of 38.8 weeks, of whom 30 were post-surgical, Dersch-Mills et al.,  
27 found that the opioid infusion was reduced within 24 hours of initiation of dexmedetomidine  
28 in 12 of the 18 infants who were on concomitant opioids [35].  
29  
30  
31  
32  
33  
34  
35  
36  
37  
38  
39  
40  
41  
42  
43  
44  
45  
46  
47  
48

49 As dexmedetomidine does not cause respiratory depression, it is postulated that its use with  
50 no or reduced doses of opioids should enable quicker weaning off mechanical ventilation  
51 and support extubation. O'Mara et al., found a significantly shorter duration of mechanical  
52 ventilation in those who received dexmedetomidine compared to those on fentanyl only  
53 (mean  $\pm$  SD: 14.4  $\pm$  7.3 vs. 28.4  $\pm$  9.9;  $p < 0.0001$ ). They also reported that clinicians  
54 extubated 19 of 28 infants who received dexmedetomidine while receiving infusion of the  
55  
56  
57  
58  
59  
60

1  
2  
3 drug at the time of extubation . Due to the early extubation, fewer infants received  
4  
5 dexamethasone (4 vs. 11) and there were fewer chest-X-rays performed (mean  $\pm$  SD:  $28 \pm$   
6  
7  $8.8$  vs.  $49 \pm 13.8$ ) in the dexmedetomidine group compared to those who received fentanyl.  
8  
9

10 The main concerns with dexmedetomidine use are bradycardia and hypotension. In the  
11  
12 general adult population, bradycardia is reported in 5 to 42% and hypotension in 24-56% of  
13  
14 those who receive dexmedetomidine[42]. Chrysostomou et al., found, in 42 neonates, that  
15  
16 the HR decreased by an average of  $12\% \pm 9\%$  and systolic BP decreased by  $14\% \pm 12\%$  at  
17  
18 6-7 hours of starting the dexmedetomidine infusion [30]. Although mostly reported to be not  
19  
20 of clinical significance, dexmedetomidine can induce reduction in HR and BP. Dersch-Mills  
21  
22 et al., analysed adverse effects in 38 infants, 36 of whom were also receiving opioid infusion  
23  
24 and found that 25 had at least one episode of bradycardia (drop of  $>20$ bpm from baseline  
25  
26 lasting for  $>2$  hours) including 7 who had a drop of  $>40$ bpm. Hypotension occurred in 15  
27  
28 infants. Dopamine was used concurrently in 17 infants of which 5 were started on dopamine  
29  
30 after the initiation of dexmedetomidine. No infants had dexmedetomidine infusion  
31  
32 discontinued due to adverse effects [35]. Similarly, Sellas et al., found that 5 of 39 infants  
33  
34 who received dexmedetomidine experienced episodes of bradycardia as compared to 2 of  
35  
36 39 in the no-dexmedetomidine group although all episodes were self-limiting and did not  
37  
38 require any intervention [34]. O'Mara et al., measured BP and HR hourly and did not see any  
39  
40 appreciable effect on either in those on dexmedetomidine compared to the infants on  
41  
42 fentanyl [28] and Morton et al., reported that following their initiative to increase use of  
43  
44 dexmedetomidine in mechanically ventilated infants, one infant had dexmedetomidine  
45  
46 discontinued due to bradycardia without haemodynamic compromise however discontinuing  
47  
48 the drug did not resolve the bradycardia [36]. Estkowski et al., compared neonates in a  
49  
50 Paediatric Intensive Care Unit with older infants and found that among the 28 neonates, 4  
51  
52 experienced hypotension and 2 had bradycardia as compared to 30 and 55 of 99 infants  
53  
54 who had hypotension and bradycardia, respectively. Three neonates required fluid bolus, 1  
55  
56  
57  
58  
59  
60

1  
2  
3 had dopamine infusion started after dexmedetomidine and 4 had dexmedetomidine  
4  
5 discontinued due to adverse events [26].  
6  
7

8 There are no reports of additional adverse events due to dexmedetomidine interacting with  
9  
10 other drugs when used in neonatal care however, polypharmacy is common in neonatal  
11  
12 practice and dexmedetomidine can, potentially interact with other frequently used drugs such  
13  
14 as phenobarbitone (additional central nervous system depression) and others such as, beta-  
15  
16 blockers and diazoxide (worsening of bradycardia and hypotension) [29].  
17  
18

### 19 20 **Conclusions and recommendations** 21

22  
23 Emerging clinical data suggest that dexmedetomidine may be an alternative to opioids and  
24  
25 benzodiazepines for managing pain and sedation in mechanically ventilated newborn  
26  
27 infants. It may help reduce the exposure to these agents and as it does not cause respiratory  
28  
29 depression, it may facilitate quicker extubation. The potential neuroprotective effect on the  
30  
31 immature brain could ease the concerns about the impact of pain and stress and that of  
32  
33 opioids and benzodiazepines on the developing brain although other reports suggest that  
34  
35 dexmedetomidine could also adversely impact the newborn brain. Despite the creeping  
36  
37 acceptance of its use in this population, there are no robust data to demonstrate either the  
38  
39 efficacy or the safety of this drug in preterm infants. The studies discussed above are  
40  
41 observational and mostly retrospective chart reviews. It is encouraging to see robust PK-PD  
42  
43 studies focussing on determining the optimal dose regimens [25]. The initial results  
44  
45 demonstrating pharmacokinetic differences between term and preterm infants suggest that  
46  
47 further population PK-PD studies are required. A Cochrane systematic review was  
48  
49 registered in 2016 [43] but there are no completed RCTs or systematic reviews of use of  
50  
51 dexmedetomidine in preterm infants. The increasing number of publications of observational  
52  
53 studies and use in clinical practice as seen by the availability of neonatal drug formularies for  
54  
55 its use demonstrates evolving practice that dexmedetomidine is being used in newborn  
56  
57 infants in neonatal units. The data on safety and efficacy are scant and not of high-quality  
58  
59  
60

1  
2  
3 and there are no data on long term neurodevelopmental impact on preterm or term-born  
4 infants. We found one registered pilot RCT [21] in term infants undergoing TH for HIE and  
5 one investigating the use of bolus dose for supporting less invasive surfactant administration  
6 in preterm infants (Table 6).  
7  
8  
9

10  
11  
12 The acceptance of dexmedetomidine in routine clinical practice must be preceded by clinical  
13 evidence. While there is a suggestion that dexmedetomidine may be the agent that could  
14 provide analgesia and sedation with minimal adverse impacts, the available data are not  
15 sufficient to ensure that it is safer than the alternatives used in current practice [44]. Although  
16 all currently used sedatives and analgesics have adverse impact on the preterm brain, new  
17 agents must be investigated thoroughly before being accepted as standard practice. We  
18 need adequately powered and well-designed randomised controlled trials investigating  
19 whether dexmedetomidine alone or in conjunction with opioids/benzodiazepines in preterm  
20 infants who require analgesia and sedation during mechanical ventilation reduces the need  
21 for opioids/benzodiazepine and improves neurodevelopment at 24 months and later as  
22 compared to the use of opioids/benzodiazepines alone.  
23  
24  
25  
26  
27  
28  
29  
30  
31  
32  
33  
34  
35  
36  
37  
38  
39  
40  
41  
42  
43  
44  
45  
46  
47  
48  
49  
50  
51  
52  
53  
54  
55  
56  
57  
58  
59  
60



**Table 1. Summary of clinical studies of dexmedetomidine in newborn infants: studies with a comparator group that did not receive any dexmedetomidine**

| Randomised controlled trials or quasi-randomised controlled trials - NONE |                                                                          |                                                                                                            |                                                                                                              |                                                                                              |                                                                                                                                                                                                                                                                                                                                                                                                                                                                                                                 |
|---------------------------------------------------------------------------|--------------------------------------------------------------------------|------------------------------------------------------------------------------------------------------------|--------------------------------------------------------------------------------------------------------------|----------------------------------------------------------------------------------------------|-----------------------------------------------------------------------------------------------------------------------------------------------------------------------------------------------------------------------------------------------------------------------------------------------------------------------------------------------------------------------------------------------------------------------------------------------------------------------------------------------------------------|
| Observational studies with comparator with no dexmedetomidine             |                                                                          |                                                                                                            |                                                                                                              |                                                                                              |                                                                                                                                                                                                                                                                                                                                                                                                                                                                                                                 |
| Reference Setting                                                         | Study design                                                             | Inclusion criteria                                                                                         | Dexmedetomidine group                                                                                        | Comparator                                                                                   | Outcomes Notes                                                                                                                                                                                                                                                                                                                                                                                                                                                                                                  |
| O'Mara 2012 [28]<br>USA<br>Single centre                                  | Retrospective case-control<br>Jan 2005-May 2010                          | <36 weeks' GA at birth,<br>< 2 weeks of life at study entry<br><br>AND<br>receiving mechanical ventilation | N= 24<br>GA: 25.5.±.1.7<br>BW: 832.±.204.2g                                                                  | Fentanyl<br>N=24<br>GA: 24.9.±.1.6<br>BW: 675.±.164.2                                        | Dexmedetomidine group had <ul style="list-style-type: none"> <li>- Shorter duration of treatment (12.5 vs. 20d)</li> <li>- Similar number of sedative boluses per day (1.7 vs. 3) but in total less total additional sedation</li> <li>- More number of days free of additional sedation</li> <li>- Reduction in number of days on mechanical ventilation (14.4(7.3) vs. 28.4(9.9))</li> <li>- Better GI function in including earlier establishment of full feeds</li> <li>- Less late onset sepsis</li> </ul> |
| Sellas 2019 [34]<br>USA<br>Single centre                                  | Retrospective cohort study with matched controls<br>Jan 2010 to Aug 2015 | Invasive surgical procedure<br>Required at least 6h of continuous sedation and/or analgesia                | Received dexmedetomidine in addition to opioids<br>N=39<br>GA: 37 (29-39)<br>PMA at surgery:39 (29-59) weeks | Opioids only (morphine or fentanyl)<br>N= 39<br>GA: 37 (27-38)<br>PMA at surgery: 37 (27-41) | 28/39 (72%) of those who received dexmedetomidine also received opioids<br>Dexmedetomidine group had <ul style="list-style-type: none"> <li>- More episodes of bradycardia (12.8% vs 5.1%; p = 0.01)</li> <li>- No difference in episodes of hypotension or respiratory depression.</li> <li>- Lower cumulative dose of opioids (1155 mcg/kg vs 1841 mcg/kg; p = 0.01)</li> </ul>                                                                                                                               |

|                                          |                                                                                                                         |                                                                                           |                                                                                  |                                                             |                                                                                                                                                                                                                                                                                                                                                                                                             |
|------------------------------------------|-------------------------------------------------------------------------------------------------------------------------|-------------------------------------------------------------------------------------------|----------------------------------------------------------------------------------|-------------------------------------------------------------|-------------------------------------------------------------------------------------------------------------------------------------------------------------------------------------------------------------------------------------------------------------------------------------------------------------------------------------------------------------------------------------------------------------|
|                                          |                                                                                                                         |                                                                                           |                                                                                  |                                                             | - No difference in the number of supplemental doses of opioids                                                                                                                                                                                                                                                                                                                                              |
| Morton 2021 [36]<br>USA<br>Single centre | QI initiative to reduce benzodiazepine exposure during<br>Pre-QI: Jan 2015 to Feb 2018<br>Post-QI: Mar 2018 to Dec 2019 | At least 35 weeks' PMA<br><14 d of sedation<br>Sedation needed for mechanical ventilation | Guideline and QI initiative to promote use of escalating dose of dexmedetomidine | Midazolam and no specific guideline for dexmedetomidine use | Proportion of infants receiving any dexmedetomidine increased from 18% to 49%<br>Infants receiving only dexmedetomidine increased from 3% to 33%<br>Infants receiving any midazolam decreased from 95% to 65%<br>Infants who received dexmedetomidine received less daily midazolam (1.3 mg/kg/d vs. 2.2 mg/kg/d)<br>Increase in midazolam free days<br>No difference in mean duration of sedation episodes |

**Table 2. Summary of clinical studies of dexmedetomidine in newborn infants: studies without a comparator group that did not receive any dexmedetomidine**

| Study ID<br>Setting                         | Study design                                                         | Inclusion criteria                                                                             | Intervention                                                                                                                               | Outcomes                                                                                                                                                             |
|---------------------------------------------|----------------------------------------------------------------------|------------------------------------------------------------------------------------------------|--------------------------------------------------------------------------------------------------------------------------------------------|----------------------------------------------------------------------------------------------------------------------------------------------------------------------|
| Chrysostomou 2014 [30]<br>USA<br>11 centres | phase II/III, open-label, multicentre safety, efficacy, and PK trial | intubated and mechanically ventilated neonates<br>gestational age $\geq 28$ to $\leq 44$ weeks | Dosing: 3 phases<br>level 1: loading dose (LD), 0.05 mg/kg; maintenance dose (MD), 0.05 mg/kg/h<br>level 2: LD, 0.1 mg/kg; MD, 0.1 mg/kg/h | Need for additional sedation: no preterms; 4 term (midazolam)<br>Need for additional analgesia: 17 (40%) – 3 preterms (fentanyl); 14 term (fentanyl and/or morphine) |

|                                                                   |                                                           |                                                                                                |                                                                                                                            |                                                                                                                                                                                                                                                                                                                                                                                                                                                                                                                                                                                                                                                                                                                              |
|-------------------------------------------------------------------|-----------------------------------------------------------|------------------------------------------------------------------------------------------------|----------------------------------------------------------------------------------------------------------------------------|------------------------------------------------------------------------------------------------------------------------------------------------------------------------------------------------------------------------------------------------------------------------------------------------------------------------------------------------------------------------------------------------------------------------------------------------------------------------------------------------------------------------------------------------------------------------------------------------------------------------------------------------------------------------------------------------------------------------------|
|                                                                   |                                                           | anticipated to require a minimum of 6 hours of continuous IV sedation<br>excluded <1kg infants | level 3: LD, 0.2 mg/kg; MD, 0.2 mg/kg/h.<br>N= 42 (18 preterm; 24 term)<br>N-PASS tool for need of sedation and analgesia  | N-PASS scores: 5% >+3 in pain; 77% between -5 and +3 (adequate) and 18% ≤-6 deep sedation<br><br>HR decreased by an average of 12%±9% at 7.7±7.3 h, and systolic BP decreased by 14%±12% at 6.5±7 h<br><br>Other adverse effects: 26 (62%) patients (11 preterm and 15 term) – diastolic hypotension, hypertension, agitation, respiratory acidosis. No discontinuation, no significant lab or ECG abnormalities                                                                                                                                                                                                                                                                                                             |
| Estkowski 2015 [26]<br>USA PICU<br>Single centre                  | Retrospective chart review<br>Oct 2007 to Aug 2012        | at least 37 weeks PMA                                                                          | Compared neonates (up to 28 days of CGA) to infants (28d CGA to 1y)<br>Neonates: N= 28 (13 born preterm)<br>Infants: N= 99 | Neonates as compared to infants had:<br><ul style="list-style-type: none"><li>- Similar minimum infusion rates</li><li>- Lower median maximum dosage: 0.4 mcg/kg/hr (IQR, 0.26-0.6) vs. 0.6 mcg/kg/hr (IQR, 0.4–0.8) (p &lt; 0.01)</li><li>- Similar duration of use: 41 (17-76) hr</li><li>- Fewer had any episode of bradycardia: 2/28 [7%] vs. 55/99 [56%] (p &lt; 0.01)</li><li>- Similar incidence of hypotension: 4/28 (14%) vs. 30/99 (30%) (p = 0.15)</li></ul> In neonates:<br>3/28 (11%) received a fluid bolus<br>4/28 (14%) dexmedetomidine discontinued due to cardiovascular adverse effects<br><br>In infants:<br>3/99 discontinued infusion due to bradycardia<br>75/99 (76%) had additional sedative agents |
| Dersch-Mills 2019 [35]<br>Canada<br>Single centre (out-born NICU) | Retrospective observational study<br>Dec 2014 to Dec 2016 | Received dexmedetomidine for ≥3 h                                                              | N=38 (30 for surgery)<br>GA: 37.1 (30.7-38.3)<br>17 preterms; 41 (6-74) days old<br>BW: 2605 (1721-3212)                   | 32/38, at least one adverse effect<br><ul style="list-style-type: none"><li>- 15, hypotension</li><li>- 25 bradycardia (drop of ≥20bpm from baseline)</li><li>- 7 severe bradycardia (drop of ≥40 bpm from baseline)</li></ul>                                                                                                                                                                                                                                                                                                                                                                                                                                                                                               |

|  |  |  |                                                                                                                    |                                                                                                                             |
|--|--|--|--------------------------------------------------------------------------------------------------------------------|-----------------------------------------------------------------------------------------------------------------------------|
|  |  |  | used for mean (range): 11.1(0.13 to 58) days<br>most (36/38) received concomitant opioid infusion, mostly fentanyl | - No dose adjustment or discontinuation for any adverse effect<br>Withdrawal: 22/38 had tachycardia and increase NAS scores |
|--|--|--|--------------------------------------------------------------------------------------------------------------------|-----------------------------------------------------------------------------------------------------------------------------|

**Table 3. Summary of case reports of dexmedetomidine in newborn infants**

| Reference Setting      | Case description                                                                                                                                                                                                                                          | outcomes Notes                                                                                                                                   |
|------------------------|-----------------------------------------------------------------------------------------------------------------------------------------------------------------------------------------------------------------------------------------------------------|--------------------------------------------------------------------------------------------------------------------------------------------------|
| Finkel 2007 [32] USA   | 2 day old, 3 kg female<br>Repair of bladder exstrophy<br>Received dexmedetomidine infusion                                                                                                                                                                | Hypothermia and bradycardia – at 0.4mcg/kg/h dose reduced and maintained on 0.2 mcg/kg/h without further adverse events                          |
| O'Mara 2009 [16] USA   | 24 week GA, 9d old infant on high frequency oscillatory ventilation.<br>Was on fentanyl and lorazepam<br>Started at 0.5mcg/kg over 10 min followed by 0.25c/kg/h increased by 0.05-0.1mcg/kg/h every 12 h if needed. Max rate of 0.7mcg/kg/h for 19 days. | Calmed and remained sedated<br>Allowed weaning of ventilation and extubation                                                                     |
| Kubota 2012 [33] Japan | Term infant - ventilated                                                                                                                                                                                                                                  | EEG confirmed seizures, stopped 12h after discontinuation of dexmedetomidine infusion without any antiepileptic medication<br>Normal development |

**Table 4. Clinical studies of use of dexmedetomidine in infants undergoing therapeutic hypothermia for HIE**

| Study ID Setting | Study design | Inclusion criteria | Dexmedetomidine group | Comparator | Outcomes Notes |
|------------------|--------------|--------------------|-----------------------|------------|----------------|
|                  |              |                    |                       |            |                |

1  
2  
3  
4  
5  
6  
7  
8  
9  
10  
11  
12  
13  
14  
15  
16  
17  
18  
19  
20  
21  
22  
23  
24  
25  
26  
27  
28  
29  
30  
31  
32  
33  
34  
35  
36  
37  
38  
39  
40  
41  
42  
43  
44  
45  
46

|                                                                 |                                                            |                                                               |                                                                                                                                                                                                                    |                                                                                      |                                                                                                                                                                                                                                                                                                                                                                                                                                                                           |
|-----------------------------------------------------------------|------------------------------------------------------------|---------------------------------------------------------------|--------------------------------------------------------------------------------------------------------------------------------------------------------------------------------------------------------------------|--------------------------------------------------------------------------------------|---------------------------------------------------------------------------------------------------------------------------------------------------------------------------------------------------------------------------------------------------------------------------------------------------------------------------------------------------------------------------------------------------------------------------------------------------------------------------|
| <p>O'Mara 2018 [38]<br/>USA<br/>Single centre</p>               | <p>Retrospective cohort study<br/>Jul 2013 to Oct 2016</p> | <p>HIE requiring TH<br/>Received dexmedetomidine for 48 h</p> | <p>N= 19<br/>2, dexmedetomidine only; 17, combination with fentanyl</p>                                                                                                                                            | <p>No comparator</p>                                                                 | <p>Fentanyl weaned down in 13/17 after starting dexmedetomidine<br/><br/>10 infants required inotropes. Initiation of dexmedetomidine did not affect HR, or BP. One infant had bradycardia – resolved with discontinuation of fentanyl<br/><br/>Clinical outcomes: 1 died; 8 had seizures</p>                                                                                                                                                                             |
| <p>Cosnahan 2021 [19]<br/>USA<br/>single centre</p>             | <p>Retrospective cohort study<br/>Jan 2018 to Apr 2020</p> | <p>HIE requiring TH (NICHD criteria)</p>                      | <p>Mar 2019-Apr2020<br/>N= 34<br/><br/>Continuous dexmedetomidine 0.3 mcg/kg/h with increments of 0.1 mcg/kg/hr based on pain scores and breakthrough morphine dose requirements<br/><br/>Maximum: 2 mcg/kg/hr</p> | <p>Jan 2018-Mar 2019<br/>N= 36<br/><br/>Intermittent morphine 0.1 mg/kg every 4h</p> | <p>No difference in N-PASS scores<br/>Dexmedetomidine group had:<br/>- Higher breakthrough morphine requirement: 0.13 (0.13) vs 0.04 (0.09) mg/kg, p = 0.001<br/>- Lower total morphine requirement: 0.13 (0.13) vs 1.79 (0.23) mg/kg, p &lt; 0.0001<br/>- Reduced respiratory support requirement<br/>- Similar outcomes for feeding, EEG and MRI scan<br/><br/>All HR measurement in normal range<br/><br/>- morphine group had higher HR and BP at some timepoints</p> |
| <p>Elliot 2022 [37] abstract only<br/>USA<br/>Single centre</p> | <p>Retrospective cohort<br/><br/>2011-2019</p>             | <p>Dexmedetomidine and/or fentanyl</p>                        | <p>Dexmedetomidine = 46<br/><br/>(14 monotherapy; 32 in combination)</p>                                                                                                                                           | <p>Fentanyl = 120</p>                                                                | <p>Dexmedetomidine group had lower HR: 91 ± 9 vs. 103 ± 11 bpm<br/><br/>Dexmedetomidine was reduced or discontinued in 22 (48%) due to inadequate sedation with low HR</p>                                                                                                                                                                                                                                                                                                |

**Table 5. Dose of dexmedetomidine in newborn infants**

| Study ID                                                                   |                    | Bolus at start of infusion                | Infusion             |                                                                    |                  |                                                                                                                                 |
|----------------------------------------------------------------------------|--------------------|-------------------------------------------|----------------------|--------------------------------------------------------------------|------------------|---------------------------------------------------------------------------------------------------------------------------------|
|                                                                            |                    |                                           | Starting dose        | Increments                                                         | Range / maximum  | Weaning                                                                                                                         |
| O'Mara 2012 [28]                                                           |                    | 0.5 mcg/kg                                | 0.3 mcg/kg/h         | 0.1 mcg/kg/hr twice daily if need for >3 doses of adjunct sedation | 0.3-1.2 mcg/kg/h | 0.1mcg/kg/h every 12 -24 hours                                                                                                  |
| Morton 2021 [36]                                                           |                    | -                                         | 0.5 mcg/kg           | 0.1 to 0.2 mcg/kg/h not more frequently than every 30 min          | 2 mcg/kg/h       | No specific regimen given                                                                                                       |
| Estkowski 2015 [26]                                                        |                    | -                                         |                      |                                                                    |                  |                                                                                                                                 |
| Dersch-Mills 2019 [35]                                                     |                    | -                                         | 0.2-0.3 mcg/kg/hr    | 0.1 mcg/kg/h based on pain and sedation scores                     | 0.5 mcg/kg/h     | No regimen specified – weaned over median of 79 hrs (IQR, 35-175). 10 infants needed clonidine (9 had dexmedetomidine for >10d) |
| Australasian Neonatal Medicines Formulary [45]                             | <37 weeks' GA      | 0.2 mcg/kg                                | 0.2 mcg/kg/h         | 0.1 to 0.2 mcg/kg/h every 30 min                                   | 1 mcg/kg/h       | 0.1 mcg/kg/h every 30 min<br>OR<br>0.2 mcg/kg/h every 8 h                                                                       |
|                                                                            | Term infant ≤ 14 d | 0.35 mcg/kg                               | 0.3 mcg/kg/h         |                                                                    | 1.2 mcg/kg/h     |                                                                                                                                 |
|                                                                            | Term infant > 14 d | 0.5 mcg/kg                                | 0.5 to 0.75 mcg/kg/h |                                                                    | 1.5 mcg/kg/h     |                                                                                                                                 |
| Neonatal Drug Dosing Guideline, IWK Health Centre (personal communication) |                    | 0.5 to 1 mcg/kg<br>“not usually required” | 0.1 to 0.3 mcg/kg/h  | 0.1 cmg/kg/h every 1 to 2 h                                        | 1 mcg/kg/h       | 0.1 mcg/kg/h every 12 to 24 h as tolerated                                                                                      |

**Table 6. Registered clinical trials**

| Study ID                                                                                                                             | Study design                                                                                | Eligibility                                                                                                                                                                                                                                                                                                                                        | Intervention                                                                                      | Comparator                                                                                                         | Outcomes                                                                                                                                                                                |
|--------------------------------------------------------------------------------------------------------------------------------------|---------------------------------------------------------------------------------------------|----------------------------------------------------------------------------------------------------------------------------------------------------------------------------------------------------------------------------------------------------------------------------------------------------------------------------------------------------|---------------------------------------------------------------------------------------------------|--------------------------------------------------------------------------------------------------------------------|-----------------------------------------------------------------------------------------------------------------------------------------------------------------------------------------|
| Dexmedetomidine for LISA Procedure in preterm infants (DEXLISA)<br><a href="#">NCT04820101</a>                                       | Single group assignment<br>Open label<br>Sample size = 40                                   | Inclusion Criteria:<br>- GA 26-36 weeks'<br>- Respiratory distress syndrome requiring surfactant therapy<br>Exclusion Criteria:<br>- Need for emergency intubation in the delivery room<br>- Major congenital malformations or chromosomal anomaly abnormalities<br>- Fetal Hydrops<br>- Hypercapnia<br>- Pneumothorax<br>- Hemodynamic compromise | Dexmedetomidine 1 mcg/kg slowly IV over 10 minutes                                                | None                                                                                                               | Change in Neonatal Infants Pain Scale score before, during and immediately after the procedure<br>In 24 h,<br>- Number of apnoea<br>- Number of severe apnoea<br>- Need for ventilation |
| Dexmedetomidine use in infants undergoing cooling due to neonatal encephalopathy (DICE) Trial<br><a href="#">NCT04772222</a><br>[46] | Randomised controlled trial<br>Parallel<br>1:1 allocation<br>Open label<br>Sample size = 50 | -≥36 weeks' GA with HIE treated with TH.<br>-requiring sedation and/or treatment to prevent shivering during TH as assessed by the Neonatal Pain, Agitation, and Sedation Scale (N-PASS) scores and a                                                                                                                                              | Dexmedetomidine<br>- Loading dose of 1 mcg/kg followed by 0.1 to 0.5 mcg/kg/h continuous infusion | Morphine<br>- Intermittent dosing every 3-4 h of 0.02-0.05 mg/kg/dose or continuous infusion of 0.005-0.01 mg/kg/h | Safety – potential adverse events such as hypotension, hypertension, bradycardia, cardiac arrhythmias, hypothermia, acute renal failure, liver failure, seizures<br><br>Shivering       |

|  |  |                                              |  |  |                                                                                                              |
|--|--|----------------------------------------------|--|--|--------------------------------------------------------------------------------------------------------------|
|  |  | modified Bedside Shivering Assessment Scale. |  |  | Days to full oral feeding<br>Mother assessment at 7d, 3-4 mo<br>Neurological assessment at 3-4 mo and 6-9 mo |
|--|--|----------------------------------------------|--|--|--------------------------------------------------------------------------------------------------------------|

Confidential: For Review Only

1  
2  
3  
4  
5  
6  
7  
8  
9  
10  
11  
12  
13  
14  
15  
16  
17  
18  
19  
20  
21  
22  
23  
24  
25  
26  
27  
28  
29  
30  
31  
32  
33  
34  
35  
36  
37  
38  
39  
40  
41  
42  
43  
44  
45  
46



## References

- 1 Sand L, Szatkowski L, Kwok TC, *et al.* Observational cohort study of changing trends in non-invasive ventilation in very preterm infants and associations with clinical outcomes. *Arch Dis Child Fetal Neonatal Ed* 2021;:fetalneonatal-2021-322390. doi:10.1136/archdischild-2021-322390
- 2 Bellù R, Romantsik O, Nava C, *et al.* Opioids for newborn infants receiving mechanical ventilation. *Cochrane Database Syst Rev* 2021;3:CD013732. doi:10.1002/14651858.CD013732.pub2
- 3 COMMITTEE ON FETUS AND NEWBORN and SECTION ON ANESTHESIOLOGY AND PAIN MEDICINE, Keels E, Sethna N, *et al.* Prevention and Management of Procedural Pain in the Neonate: An Update. *Pediatrics* 2016;137:e20154271. doi:10.1542/peds.2015-4271
- 4 Anand KJ. Clinical importance of pain and stress in preterm neonates. *Biol Neonate* 1998;73:1–9. doi:10.1159/000013953
- 5 Anand KJ, Sippell WG, Aynsley-Green A. Randomised trial of fentanyl anaesthesia in preterm babies undergoing surgery: effects on the stress response. *Lancet* 1987;1:243–8. doi:10.1016/s0140-6736(87)90065-1
- 6 McPherson C, Miller SP, El-Dib M, *et al.* The influence of pain, agitation, and their management on the immature brain. *Pediatr Res* 2020;88:168–75. doi:10.1038/s41390-019-0744-6
- 7 Carbajal R, Eriksson M, Courtois E, *et al.* Sedation and analgesia practices in neonatal intensive care units (EUROPAIN): results from a prospective cohort study. *Lancet Respir Med* 2015;3:796–812. doi:10.1016/S2213-2600(15)00331-8
- 8 Zimmerman KO, Smith PB, Benjamin DK, *et al.* Sedation, Analgesia, and Paralysis during Mechanical Ventilation of Premature Infants. *J Pediatr* 2017;180:99-104.e1. doi:10.1016/j.jpeds.2016.07.001
- 9 Ancora G, Lago P, Garetti E, *et al.* Evidence-based clinical guidelines on analgesia and sedation in newborn infants undergoing assisted ventilation and endotracheal intubation. *Acta Paediatr* 2019;108:208–17. doi:10.1111/apa.14606
- 10 Ancora G, Lago P, Garetti E, *et al.* Efficacy and safety of continuous infusion of fentanyl for pain control in preterm newborns on mechanical ventilation. *J Pediatr* 2013;163:645-651.e1. doi:10.1016/j.jpeds.2013.02.039
- 11 MacGregor R, Evans D, Sugden D, *et al.* Outcome at 5-6 years of prematurely born children who received morphine as neonates. *Arch Dis Child Fetal Neonatal Ed* 1998;79:F40-43. doi:10.1136/fn.79.1.f40
- 12 Puia-Dumitrescu M, Comstock BA, Li S, *et al.* Assessment of 2-Year Neurodevelopmental Outcomes in Extremely Preterm Infants Receiving Opioids and Benzodiazepines. *JAMA Netw Open* 2021;4:e2115998. doi:10.1001/jamanetworkopen.2021.15998

- 13 Al-Turkait A, Szatkowski L, Choonara I, *et al.* Drug utilisation in neonatal units in England and Wales: a national cohort study. *Eur J Clin Pharmacol* Published Online First: 13 January 2022. doi:10.1007/s00228-021-03267-x
- 14 Gertler R, Brown HC, Mitchell DH, *et al.* Dexmedetomidine: a novel sedative-analgesic agent. *Proc (Bayl Univ Med Cent)* 2001;**14**:13–21. doi:10.1080/08998280.2001.11927725
- 15 European Medicines Agency. Dexmedetomidine Accord. 2022. <https://www.ema.europa.eu/en/medicines/human/EPAR/dexmedetomidine-accord#authorisation-details-section> (accessed 11 Feb 2022).
- 16 O'Mara K, Gal P, Ransom JL, *et al.* Successful Use of Dexmedetomidine for Sedation in a 24-Week Gestational Age Neonate. *Ann Pharmacother* 2009;**43**:1707–13. doi:10.1345/aph.1M245
- 17 Mahmoud M, Barbi E, Mason KP. Dexmedetomidine: What's New for Pediatrics? A Narrative Review. *JCM* 2020;**9**:2724. doi:10.3390/jcm9092724
- 18 Schoeler M, Loetscher PD, Rossaint R, *et al.* Dexmedetomidine is neuroprotective in an in vitro model for traumatic brain injury. *BMC Neurol* 2012;**12**:20. doi:10.1186/1471-2377-12-20
- 19 Cosnahan AS, Angert RM, Jano E, *et al.* Dexmedetomidine versus intermittent morphine for sedation of neonates with encephalopathy undergoing therapeutic hypothermia. *J Perinatol* 2021;**41**:2284–91. doi:10.1038/s41372-021-00998-8
- 20 Ren X, Ma H, Zuo Z. Dexmedetomidine Postconditioning Reduces Brain Injury after Brain Hypoxia-Ischemia in Neonatal Rats. *J Neuroimmune Pharmacol* 2016;**11**:238–47. doi:10.1007/s11481-016-9658-9
- 21 Ezzati M, Kawano G, Rocha-Ferreira E, *et al.* Dexmedetomidine Combined with Therapeutic Hypothermia Is Associated with Cardiovascular Instability and Neurotoxicity in a Piglet Model of Perinatal Asphyxia. *Dev Neurosci* 2017;**39**:156–70. doi:10.1159/000458438
- 22 Pancaro C, Segal BS, Sikes RW, *et al.* Dexmedetomidine and ketamine show distinct patterns of cell degeneration and apoptosis in the developing rat neonatal brain. *J Matern Fetal Neonatal Med* 2016;**29**:3827–33. doi:10.3109/14767058.2016.1148132
- 23 Cortes-Ledesma C, Arruza L, Sainz-Villamayor A, *et al.* Dexmedetomidine affects cerebral activity in preterm infants. *Arch Dis Child Fetal Neonatal Ed* 2022;:fetalneonatal-2021-323411. doi:10.1136/archdischild-2021-323411
- 24 Duerden EG, Guo T, Dodbiba L, *et al.* Midazolam dose correlates with abnormal hippocampal growth and neurodevelopmental outcome in preterm infants. *Ann Neurol* 2016;**79**:548–59. doi:10.1002/ana.24601
- 25 van Dijkman SC, De Cock PAJG, Smets K, *et al.* Dose rationale and pharmacokinetics of dexmedetomidine in mechanically ventilated new-borns: impact of design optimisation. *Eur J Clin Pharmacol* 2019;**75**:1393–404. doi:10.1007/s00228-019-02708-y
- 26 Estkowski LM, Morris JL, Sinclair EA. Characterization of Dexmedetomidine Dosing and Safety in Neonates and Infants. *The Journal of Pediatric Pharmacology and Therapeutics* 2015;**20**:112–8. doi:10.5863/1551-6776-20.2.112

- 1  
2  
3 27 Potts AL, Anderson BJ, Warman GR, *et al.* Dexmedetomidine pharmacokinetics in  
4 pediatric intensive care--a pooled analysis. *Paediatr Anaesth* 2009;**19**:1119–29.  
5 doi:10.1111/j.1460-9592.2009.03133.x  
6
- 7 28 O'Mara K, Gal P, Wimmer J, *et al.* Dexmedetomidine Versus Standard Therapy with  
8 Fentanyl for Sedation in Mechanically Ventilated Premature Neonates. *The Journal of*  
9 *Pediatric Pharmacology and Therapeutics* 2012;**17**:252–62. doi:10.5863/1551-6776-  
10 17.3.252  
11
- 12 29 *BNF FOR CHILDREN (BNFC) 2020-2021*. S.I.: : PHARMACEUTICAL PRESS 2020.  
13
- 14 30 Chrysostomou C, Schulman SR, Herrera Castellanos M, *et al.* A Phase II/III, Multicenter,  
15 Safety, Efficacy, and Pharmacokinetic Study of Dexmedetomidine in Preterm and Term  
16 Neonates. *The Journal of Pediatrics* 2014;**164**:276–282.e3.  
17 doi:10.1016/j.jpeds.2013.10.002  
18
- 19 31 McAdams RM, Pak D, Lalovic B, *et al.* Dexmedetomidine Pharmacokinetics in Neonates  
20 with Hypoxic-Ischemic Encephalopathy Receiving Hypothermia. *Anesthesiology*  
21 *Research and Practice* 2020;**2020**:1–15. doi:10.1155/2020/2582965  
22
- 23 32 Finkel JC, Quezado ZMN. Hypothermia-induced bradycardia in a neonate receiving  
24 dexmedetomidine. *J Clin Anesth* 2007;**19**:290–2. doi:10.1016/j.jclinane.2006.08.011  
25
- 26 33 Kubota T, Fukasawa T, Kitamura E, *et al.* Epileptic seizures induced by  
27 dexmedetomidine in a neonate. *Brain and Development* 2013;**35**:360–2.  
28 doi:10.1016/j.braindev.2012.05.011  
29
- 30 34 Sellas MN, Kyllonen KC, Lepak MR, *et al.* Dexmedetomidine for the Management of  
31 Postoperative Pain and Sedation in Newborns. *The Journal of Pediatric Pharmacology*  
32 *and Therapeutics* 2019;**24**:227–33. doi:10.5863/1551-6776-24.3.227  
33
- 34 35 Dersch-Mills DA, Banasch HL, Yusuf K, *et al.* Dexmedetomidine Use in a Tertiary Care  
35 NICU: A Descriptive Study. *Ann Pharmacother* 2019;**53**:464–70.  
36 doi:10.1177/1060028018812089  
37
- 38 36 Morton SU, Labrecque M, Moline M, *et al.* Reducing Benzodiazepine Exposure by  
39 Instituting a Guideline for Dexmedetomidine Usage in the NICU. *Pediatrics*  
40 2021;**148**:e2020041566. doi:10.1542/peds.2020-041566  
41
- 42 37 Elliott M, Burnsed J, Heinan K, *et al.* Effect of dexmedetomidine on heart rate in  
43 neonates with hypoxic ischemic encephalopathy undergoing therapeutic hypothermia. *J*  
44 *Neonatal Perinatal Med* 2022;**15**:47–54. doi:10.3233/NPM-210737  
45
- 46 38 O'Mara K, Weiss M. Dexmedetomidine for Sedation of Neonates with HIE Undergoing  
47 Therapeutic Hypothermia: A Single-Center Experience. *AJP Rep* 2018;**08**:e168–73.  
48 doi:10.1055/s-0038-1669938  
49
- 50 39 Inserra E, Colella U, Caredda E, *et al.* Safety and effectiveness of intranasal  
51 dexmedetomidine together with midazolam for sedation in neonatal MRI. *Pediatr*  
52 *Anaesth* 2022;**32**:79–81. doi:10.1111/pan.14307  
53
- 54 40 Bua J, Massaro M, Cossovel F, *et al.* Intranasal dexmedetomidine, as midazolam-  
55 sparing drug, for MRI in preterm neonates. *Paediatr Anaesth* 2018;**28**:747–8.  
56 doi:10.1111/pan.13454  
57  
58  
59  
60

- 1  
2  
3 41 Stark A, Smith PB, Hornik CP, *et al.* Medication Use in the Neonatal Intensive Care Unit  
4 and Changes from 2010 to 2018. *J Pediatr* 2022;**240**:66-71.e4.  
5 doi:10.1016/j.jpeds.2021.08.075  
6  
7 42 UpToDate. Lexicomp-UpToDate Dexmedetomidine: Pediatric drug information.  
8 <https://www.uptodate.com/contents/table-of-contents/drug-information> (accessed 29 Mar  
9 2022).  
10  
11 43 Ibrahim M, Jones LJ, Lai NM, *et al.* Dexmedetomidine for analgesia and sedation in  
12 newborn infants receiving mechanical ventilation. *Cochrane Database of Systematic*  
13 *Reviews* Published Online First: 17 September 2016. doi:10.1002/14651858.CD012361  
14  
15 44 Barrington K. Dexmedetomidine:new wonder drug or next neonatal disaster? Neonatal  
16 Research. 2022.[https://neonatalresearch.org/2022/03/23/dexmedetomidine-new-](https://neonatalresearch.org/2022/03/23/dexmedetomidine-new-wonder-drug-or-next-neonatal-disaster/)  
17 [wonder-drug-or-next-neonatal-disaster/](https://neonatalresearch.org/2022/03/23/dexmedetomidine-new-wonder-drug-or-next-neonatal-disaster/) (accessed 19 Apr 2022).  
18  
19 45 Australasian Neonatal Medicines Formulary. Dexmedetomidine: neowborn use only.  
20 2021.[https://www.anmfonline.org/wp-content/uploads/2021/06/dexmedetomidine-](https://www.anmfonline.org/wp-content/uploads/2021/06/dexmedetomidine-18022021-2.0.pdf)  
21 [18022021-2.0.pdf](https://www.anmfonline.org/wp-content/uploads/2021/06/dexmedetomidine-18022021-2.0.pdf)  
22  
23 46 Baserga M, DuPont TL, Ostrander B, *et al.* Dexmedetomidine Use in Infants Undergoing  
24 Cooling Due to Neonatal Encephalopathy (DICE Trial): A Randomized Controlled Trial:  
25 Background, Aims and Study Protocol. *Front Pain Res* 2021;**2**:770511.  
26 doi:10.3389/fpain.2021.770511  
27  
28  
29  
30  
31  
32  
33  
34  
35  
36  
37  
38  
39  
40  
41  
42  
43  
44  
45  
46  
47  
48  
49  
50  
51  
52  
53  
54  
55  
56  
57  
58  
59  
60

1  
2  
3  
4 **Title: Sedation and analgesia from prolonged pain and stress during mechanical**  
5  
6 **ventilation in preterm infants: Is dexmedetomidine an alternative to current practice?**  
7  
8  
9

10  
11  
12 **Authors**  
13

14  
15  
16 1. Shalini Ojha

17 [shalini.ojha@nottingham.ac.uk](mailto:shalini.ojha@nottingham.ac.uk)

18  
19  
20 Academic Unit of Lifespan and Population Health, School of Medicine, University of  
21  
22 Nottingham, Nottingham, UK and Neonatal Unit, University Hospitals of Derby and  
23  
24 Burton NHS Trust, Derby, UK  
25

26 2. Janine Abramson

27  
28 [Janine.abramson@nottingham.ac.uk](mailto:Janine.abramson@nottingham.ac.uk)

29  
30 Academic Unit of Lifespan and Population Health, School of Medicine, University of  
31  
32 Nottingham, Nottingham, UK  
33

34 3. Jon Dorling

35  
36 [Jon.dorling@uhs.nhs.uk](mailto:Jon.dorling@uhs.nhs.uk)

37  
38 Neonatal Intensive Care Unit, University Hospitals of Southampton, Southampton,  
39  
40 UK  
41  
42

43  
44 **Corresponding author:** Dr Shalini Ojha, Academic Unit of Lifespan and Population Health,  
45  
46 School of Medicine, University of Nottingham. Room 4117, Medical School Building, Royal  
47  
48 Derby Hospital, Derby DE22 3NE; email: [shalini.ojha@nottingham.ac.uk](mailto:shalini.ojha@nottingham.ac.uk)  
49

50  
51 [Orchid ID: https://orcid.org/0000-0001-5668-4227](https://orcid.org/0000-0001-5668-4227)  
52  
53

54 **Short title:** Dexmedetomidine in newborn infants  
55

56  
57 **Funding Support:** The authors did not receive any external funding.  
58  
59  
60

### Patient and Public Involvement statement

How was the development of the research question and outcome measures informed by patients' priorities, experience, and preferences?

- N/A

How did you involve patients in the design of this study?

- N/A

Were patients involved in the recruitment to and conduct of the study?

- There was no direct patient involvement.

How will the results be disseminated to study participants?

- The results of the study will be communicated via Bliss, UK's largest charity for sick and preterm infants, and via social media accounts of the authors and their institutions.

For randomised controlled trials, was the burden of the intervention assessed by patients themselves?

- N/A

Patient advisers should also be thanked in the contributorship statement/acknowledgements.

- N/A

**Word count:** 26303172

**Number of tables:** 5

**Number of figures:** 0

**Contributors' statement**

SO and JD conceived the piece. SO led the write up. JA conducted the literature search and completed the study summaries. SO, JD, and JA revised and approved the final manuscript.

All authors approved the final manuscript as submitted and agree to be accountable for all aspects of the work.

**Conflict of Interest Disclosures and funding sources:** Shalini Ojha has received funds from the National Institute of Health Research, UK and the Medical Research Council, UK for other research. Jon Dorling has received funds from the National Institute of Health Research, UK, Canadian Institute for Health Research, Canada, Nova Scotia Research, Canada and Action Medical Research, UK for other research. The authors have no other conflicts of interest relevant to this article to disclose.

**Abstract** (292/300 words)

Mechanical ventilation is an uncomfortable and potentially painful intervention. Opioids, such as morphine and fentanyl are used for analgesia and sedation but there is uncertainty whether they reduce pain in mechanically ventilated infants. Moreover, there may be short and long-term adverse consequences such as respiratory depression leading to prolonged mechanical ventilation and detrimental long-term neurodevelopmental effects. Despite this, opioids are widely used, possibly due to a lack of alternatives.

Dexmedetomidine, a highly selective alpha-2-adrenergic agonist with analgesic and sedative effects, currently approved for adults, has come into use in newborn infants. It provides analgesia and simulates natural sleep with maintenance of spontaneous breathing and upper airway tone. Although data on pharmacokinetics-pharmacodynamics in preterm infants are scant, observational studies report that using dexmedetomidine in conjunction with opioids/benzodiazepines or on its own can reduce the cumulative exposure to opioids/benzodiazepines. As it does not cause respiratory depression, dexmedetomidine could enable quicker weaning and extubation. Dexmedetomidine has also been suggested as an adjunct to therapeutic hypothermia in hypoxic ischaemic encephalopathy and others have used it during painful procedures and surgery. Dexmedetomidine infusion can cause bradycardia and hypotension although most report clinically insignificant effects.

The increasing number of publications of observational studies and clinical use demonstrates that dexmedetomidine is being used in newborn infants but data on safety and efficacy are scant and not of high-quality. Importantly, there are no data on long term neurodevelopmental impact on preterm or term-born infants. The acceptance of dexmedetomidine in routine clinical practice must be preceded by clinical evidence. We need adequately powered and well-designed randomised controlled trials investigating whether dexmedetomidine alone or with opioids/benzodiazepines in infants on mechanical



1  
2  
3 ventilation reduces the need for opioids/benzodiazepine and improves neurodevelopment at  
4  
5 24 months and later as compared to the use of opioids/benzodiazepines alone.  
6  
7  
8  
9  
10  
11  
12  
13  
14  
15  
16  
17  
18  
19  
20  
21  
22  
23  
24  
25  
26  
27  
28  
29  
30  
31  
32  
33  
34  
35  
36  
37  
38  
39  
40  
41  
42  
43  
44  
45  
46  
47  
48  
49  
50  
51  
52  
53  
54  
55  
56  
57  
58  
59  
60

Confidential: For Review Only

1  
2  
3 **Key-words:** infant, preterm; dexmedetomidine, mechanical ventilation  
4  
5  
6  
7  
8

9 **Abbreviations:** BP, blood pressure; GA, gestational age; HIE, hypoxic-ischaemic  
10 encephalopathy; HR, heart rate; IQR, inter-quartile range; IVH, intraventricular haemorrhage;  
11 LD, loading dose; MD, maintenance dose; NEC, necrotising enterocolitis; NICU, neonatal  
12 intensive care unit; PD, pharmacodynamics; PK, pharmacokinetics; PMA, post-menstrual  
13 age; TH, therapeutic hypothermia  
14  
15  
16  
17  
18  
19  
20  
21  
22  
23  
24  
25  
26  
27  
28  
29  
30  
31  
32  
33  
34  
35  
36  
37  
38  
39  
40  
41  
42  
43  
44  
45  
46  
47  
48  
49  
50  
51  
52  
53  
54  
55  
56  
57  
58  
59  
60

## Key Messages

- Mechanical ventilation is a potentially painful intervention. Opioids and benzodiazepines are widely used to provide analgesia and sedation in mechanically ventilated infants.
- Evidence suggests that opioids may be ineffective analgesics and there may be adverse consequences such as respiratory depression and detrimental long-term neurodevelopmental effects.
- Dexmedetomidine, a highly selective alpha-2-adrenergic agonist provides analgesia and simulates natural sleep with maintenance of spontaneous breathing and upper airway tone.
- Emerging observational studies suggest that dexmedetomidine use in mechanically ventilated infants may reduce exposure to opioids/benzodiazepines and enable quicker weaning and extubation.
- ~~D~~However, data on safety and efficacy are scant. Adequately powered randomised controlled trials investigating use of dexmedetomidine in preterm infants are required.

## Introduction

Mechanical ventilation via a tracheal tube is widely used for respiratory support in preterm infants. In England and Wales, despite the increase in use of non-invasive respiratory support, 57% of very preterm infants were mechanically ventilated on the day of birth and many others require ventilatory support later in the course of their care [1]. This included 91% of extremely preterm infants and the increasing survival of those born at these gestations could lead to further increases in the use of mechanical ventilation in neonatal care.

It is now well accepted that preterm infants perceive pain. Mechanical ventilation is an uncomfortable and potentially painful intervention. Ventilated infants are, often, also subjected to multiple painful procedures and experience pain caused by underlying diseases such as necrotising enterocolitis (NEC) [2,3]. Pain and stress cause cardiorespiratory instability including interference with the ventilator synchronising with the infant's breathing efforts that lead to suboptimal ventilation, fluctuations in heart rate (HR), respiratory rate, blood pressure (BP), and oxygen saturation with complications such as intraventricular haemorrhages (IVH) and metabolic instability [4].

## Pain in preterm infants

Preterm infants have enhanced hormonal and physiological responses to pain. In 1987, Anand et al., showed that preterm infants undergoing patent ductus arteriosus surgery who did not receive fentanyl had a significantly higher hormonal stress response compared to those who received fentanyl [5]. More recently, magnetic resonance imaging studies identified that exposure to pain and stress in neonatal care alters corticospinal tract, and subcortical white matter development with further evidence of reduced volume of the somatosensory thalamus and changes in the cortex, limbic system and basal ganglia, and the white matter that persist into school age [6].

1  
2  
3 Management of pain and agitation is fundamental to good intensive care, yet neonatal pain  
4 is inconsistently assessed and inadequately managed [3]. A prospective cohort study of 243  
5 European neonatal intensive care units (NICUs), the European Pain Audit in Neonates  
6 (EUROPAIN), reported 34% of admissions, including 82% of those who were mechanically  
7 ventilated, received some sedation or analgesia [7]. A retrospective cohort study from 348  
8  
9  
10  
11  
12  
13  
14  
15  
16  
17  
18  
19  
20  
21  
22  
23  
24  
25  
26  
27  
28  
29  
30  
31  
32  
33  
34  
35  
36  
37  
38  
39  
40  
41  
42  
43  
44  
45  
46  
47  
48  
49  
50  
51  
52  
53  
54  
55  
56  
57  
58  
59  
60

Pediatrics Medical Group NICUs in the USA found that infants received a sedative, analgesic or paralytic only on 33% of days that they were mechanically ventilated [8].

Although optimal management of pain and sedation during mechanical ventilation is as yet undiscovered, selective use of continuous infusion of opioids is recommended for infants who are mechanically ventilated for prolonged periods [3,9]. These recommendations stand despite the 2021 update of the Cochrane review that concluded that there is uncertainty whether opioids have any effect on reducing pain in mechanically ventilated infants [2]. In addition, there may be short and long-term adverse consequences of morphine infusion in preterm infants such as respiratory depression leading to prolonged duration of mechanical ventilation and detrimental long-term neurodevelopmental effects. The Cochrane systematic review [2] includes one trial that reported neurodevelopment at 18-24 months: Ancora 2013 [10] (RR 2.00, 95% CI 0.39 to 10.29; 78 participants); and one study that reported neurodevelopment outcomes at 5-6 years of age [11]: MacGregor 1998 (RR 1.60, 95% CI 0.56 to 4.56; 95 participants) and concluded the evidence was uncertain. Puia-Dumitrescu et al., [12], performed a post-hoc analysis of infants who participated in the Preterm Erythropoietin Neuroprotection Trial to investigate the effect of ~~exposer~~exposure to opioids and benzodiazepines on development at 22-26 months' corrected age. Of the 936 extremely preterm infants 481 (51%) received opioids; 297 (32%) received both opioids and benzodiazepines; and 20 (2%) received benzodiazepines only. Infants exposed to both groups of drugs had more co-morbidities compared to those exposed to only one or none with higher adjusted odds of IVH, NEC, severe bronchopulmonary dysplasia, and retinopathy of prematurity, and longer length of hospital stay. Outcomes at 2-years were

1  
2  
3 negatively associated with the combined use of opioids and benzodiazepines even after  
4 adjusting for potential confounders. The lowest scores were noted among the infants who  
5 received the drugs for more than 7 days (median (IQR) score of 85 (73-97)) compared to 97  
6 (91-107) in infants with no exposure. However, this was not a randomised allocation and the  
7 higher prevalence of multiple co-morbidities in the group that received drugs makes it difficult  
8 to interpret the results.  
9  
10  
11  
12  
13  
14

15  
16 Despite these uncertainties, opioids are the most popular choice for management of pain  
17 and sedation in mechanically ventilated infants. Of the 2142 mechanically ventilated infants  
18 included in the EUROPAIN audit, morphine and fentanyl were given to 923 (43%) and 639  
19 (29%) infants, respectively, while 536 (25%) received midazolam [7]. Zimmerman et al.  
20 similarly reported that in 433,587 ventilated-days, fentanyl (17%), midazolam (14%) and  
21 morphine (9%) were the most frequently administered drugs [8]. They also reported increase  
22 in administration of opioids during mechanical ventilation from 5% of ventilated days in 1997  
23 to 32% in 2012. In the UK, the percentage of very preterm infants who receive intravenous  
24 morphine increased from 32% in 2010 to 37% in 2017 [13].  
25  
26  
27  
28  
29  
30  
31  
32  
33  
34  
35

### 36 **Dexmedetomidine: an alternative agent for pain and sedation in newborn infants**

37  
38 This high use of opioids despite the uncertainty about benefit and harm is possibly due to a  
39 lack of alternative agents that could provide adequate and safe sedation and analgesia in  
40 newborn infants. Recently, dexmedetomidine, a highly selective alpha-2-adrenergic agonist  
41 (16290:1::α2:α1 specificity) with sedative and analgesic effects has come into use in  
42 newborn infants receiving mechanical ventilation [14][14]. Several recent studies have  
43 explored the off-label use of dexmedetomidine in newborn infants for sedation and analgesia  
44 in NICU settings. A summary of the studies is given in Tables 1-4.  
45  
46  
47  
48  
49  
50  
51  
52  
53  
54

55  
56 Dexmedetomidine, first approved by the USA Food and Drug Administration in 1999 is  
57 similarly authorised by the European Medicine Agency [15] for use for sedation in adult  
58 intensive care unit patients requiring sedation level no deeper than arousal in response to  
59  
60

1  
2  
3 verbal stimulation and for sedation of non-intubated patients ~~prior to~~before and/or during  
4  
5 diagnostic or surgical procedures requiring sedation. It provides analgesia via inhibition of  
6  
7 substance P release from the dorsal horns of the spinal cord while the anxiolysis and  
8  
9 sedation are believed to be due to the reduction in sympathetic outflow from the locus  
10  
11 coeruleus [16]. It stimulates the natural sleep pathways and induces activity similar to non-  
12  
13 REM sleep in adults and children [17]. The effects on respiration and airway also mimic  
14  
15 natural sleep and therefore maintain spontaneous breathing and upper airway tone [17].  
16  
17

18  
19 Although there are no data to examine the early exposure to dexmedetomidine and long-  
20  
21 term neurocognitive function in children, animal studies suggest that dexmedetomidine may  
22  
23 have some neuroprotective effects including cell-protective effects under ischemic conditions  
24  
25 and after traumatic brain injury [18]. In rodents, cortical and white matter loss after hypoxic-  
26  
27 ischaemic injury may be prevented by dexmedetomidine [19]. In another rat model, brain  
28  
29 tissue and cell loss induced by hypoxia-ischaemia were attenuated by dexmedetomidine  
30  
31 post-conditioning, an effect that was inhibited by  $\alpha$ 2-adrenergic antagonists suggesting that  
32  
33 the protective effect was mediated by  $\alpha$ 2-adrenergic receptor activation [20]. However, when  
34  
35 combined with hypothermia, Ezzati et al., found that dexmedetomidine was associated with  
36  
37 adverse cardiovascular events and was neurotoxic following hypoxia-ischaemia [21]. In a  
38  
39 model comparing the effect of ketamine to that of dexmedetomidine on brain cell  
40  
41 degeneration and apoptosis in postnatal day-7 rats, dexmedetomidine produced significant  
42  
43 damage in the primary sensory regions which was different to the limbic injury induced by  
44  
45 ketamine [22]. In ten mechanically ventilated very low birth weight infants born at 25 to 30  
46  
47 weeks' gestational age who received dexmedetomidine infusion (2 to 30 days of postnatal  
48  
49 age), Cortes-Ledesma et al., found that after 6 hours of dexmedetomidine infusion (0.1 to  
50  
51 0.4 mcg/kg/min), brain regional oxygen saturation decreased and fractional oxygen tissue  
52  
53 extraction increased without any change in heart rate, mean blood pressure, oxygen  
54  
55 saturation, or haemoglobin while amplitude integrated EEG showed a prolongation of inter-  
56  
57 burst interval [23]. As the decrease in brain oxygen saturation could not be related to  
58  
59  
60

1  
2  
3 increased brain activity, it suggested a vasoconstrictor effect on cerebral vessels [23].  
4  
5 Currently used sedative and analgesics also adversely impact brain development e.g.,  
6  
7 exposure to midazolam is associated with macro- and microstructural alterations in  
8  
9 hippocampal development and lower cognitive scores [24] while opioid use is linked to  
10  
11 reduced cerebellar volume, poorer cognitive and motor outcomes and behavioural problems  
12  
13 in infancy [6]. No clinical studies have investigated the impact of dexmedetomidine on  
14  
15 neurological outcomes or neurodevelopment in preterm or term-born infants.  
16  
17

### 18 19 **Pharmacological studies on dexmedetomidine in newborn infants**

20  
21  
22 The evaluation of pharmacokinetics (PK), pharmacodynamics (PD), efficacy and safety of  
23  
24 drugs in vulnerable newborn infants is challenging [24]. Dexmedetomidine is metabolised via  
25  
26 glucuronidation, hydroxylation (via CYP2A6), and N-methylation and primarily eliminated via  
27  
28 the urine [25]. As these pathways, particularly glucuronidation, are immature in the first year  
29  
30 after birth, dexmedetomidine clearance may be decreased but there is a lack of PK-PD  
31  
32 studies in preterm infants [17].  
33  
34

35  
36 The therapeutic window for dexmedetomidine in older children is 0.4 to 0.8 mcg/L (optimum  
37  
38 level around 0.6 mcg/L) [26] with a safety measure of maintaining plasma concentrations  
39  
40 below 1mcg/L and is assumed to be the same in neonatal studies [24]. The clinical  
41  
42 applicability of these serum concentrations is not yet determined and surrogate markers of  
43  
44 efficacy such as pain and sedation scores are used to determine clinical utility and titrate  
45  
46 dosing [27]. The drug is available as dexmedetomidine hydrochloride (100 mcg/mL or  
47  
48 4mcg/ml) [28], usually delivered in a concentration of 0.5 to 1 mcg/ml as a loading dose (LD)  
49  
50 over 10-20 min and maintenance dose (MD) as continuous infusion using rate-controlled  
51  
52 syringe pumps. In a phase II/III open-label, safety, efficacy, and PK trial including 11 centres,  
53  
54 Chrysostomou et al., investigated three escalating dose regimens (LD followed by MD) of  
55  
56 dexmedetomidine mechanically ventilated 28-44 weeks' GA infants [29]. In 42 infants (18  
57  
58 preterm and 24 term-born), they found that additional sedation (midazolam) was required  
59  
60



1  
2  
3 only in 4 infants (all term-born) while additional analgesia (fentanyl or morphine) was  
4  
5 required in 17 infants (3 preterms, and 14 term-born). Using the Neonatal Pain and Sedation  
6  
7 Scale (N-PASS), they found that at all three dose levels, infants had signs of pain or  
8  
9 agitation (N-PASS score >3) at 5% time-points only. Preterm infants, as compared to term  
10  
11 infants, had lower weight-adjusted plasma clearance (0.3 vs. 0.9 L/h/Kg) and increased  
12  
13 elimination half-life (7.6 vs. 3.2 h). Van Dijkman et al., performed a dose-finding study of  
14  
15 dexmedetomidine in mechanically ventilated newborn infants who received  
16  
17 dexmedetomidine infusion over 24-hours. Initial dosing (0.3 mcg/kg/h) was determined by  
18  
19 extrapolation of previously published PK of dexmedetomidine in older children and was  
20  
21 subsequently increased to 0.4 mcg/kg/h in the follow-up phase due to higher clearance of  
22  
23 the drug. Additional sedation was required in 83% of the participants as indicated by  
24  
25 Comfort-neo scores. In 7 term infants with HIE and therapeutic hypothermia (TH), McAdams  
26  
27 et al., found that dexmedetomidine clearance was either comparable or lower but volume of  
28  
29 distribution was larger compared to estimates in normothermic infants [30]. They  
30  
31 recommended doses up to 0.4 mcg/kg/h and that a LD may be needed to achieve  
32  
33 therapeutic concentration without a lag. Dose regimens used in published clinical studies of  
34  
35 preterm infants and available neonatal formularies are given in Table 5.  
36  
37  
38  
39

#### 40 **Clinical reports of the use of dexmedetomidine in preterm infants**

41  
42  
43 Case reports of dexmedetomidine use to sedate a difficult to ventilate 24 weeks' gestational  
44  
45 age (GA) infant [16] and others reporting adverse effects [31,32] were followed by larger  
46  
47 single centre studies. Use has been reported in extremely preterm infants in the first weeks  
48  
49 after birth [16,27], in preterm infants at later postmenstrual ages (PMA) and term-born  
50  
51 infants , after surgical procedures [34,35], and in infants undergoing therapeutic  
52  
53 hypothermia (TH) for hypoxic ischaemic encephalopathy (HIE) [19,37,38]. It is also used for  
54  
55 sedation during procedures such as magnetic resonance imaging [39,40]. In an update of  
56  
57 medication prescribing patterns in the US neonatal intensive care units, Stark et al., reported  
58  
59 that between 2010 and 2018, dexmedetomidine was ninth in the list of drugs that had the  
60

1  
2  
3 greatest relative increase in use and had become the 90<sup>th</sup> most frequently prescribed  
4 medication [41] although its use was not reported, at least until 2017, in neonatal care in the  
5 UK [13].  
6  
7  
8  
9

10 Dexmedetomidine is used for sedation and analgesia on its own or in combination with other  
11 agents with the aim of reducing cumulative exposure to opioids and benzodiazepines.

12  
13 Comparing 48 infants with a mean GA of 25 weeks who received either fentanyl or  
14 dexmedetomidine, O'Mara et al., found that the dexmedetomidine group required less  
15 adjunctive sedation [28]. Comparing 39 infants who received dexmedetomidine, (including  
16 28 who concomitantly received opioid infusion) with 39 matched controls who only received  
17 opioids, Sellas et al., found that there was no difference in the duration of use or the number  
18 of doses of opioids but the total dose of opioids received was lower in the group that  
19 received dexmedetomidine [34]. With an aim to reduce benzodiazepine exposure in infants  
20 who were at least 35 weeks' PMA and needed sedation for mechanical ventilation, Morton et  
21 al., implemented a quality improvement project with a sedation guideline recommending the  
22 use of dexmedetomidine as initial agent or in addition to midazolam. They demonstrated  
23 reduction in use of midazolam with fewer infants receiving midazolam, increased midazolam-  
24 free days, and lower daily midazolam doses in those who received additional  
25 dexmedetomidine without any increase in the mean duration of sedation episodes [36]. In 38  
26 infants at a median PMA of 38.8 weeks, of whom 30 were post-surgical, Dersch-Mills et al.,  
27 found that the opioid infusion was reduced within 24 hours of initiation of dexmedetomidine  
28 in 12 of the 18 infants who were on concomitant opioids [35].  
29  
30  
31  
32  
33  
34  
35  
36  
37  
38  
39  
40  
41  
42  
43  
44  
45  
46  
47  
48

49 As dexmedetomidine does not cause respiratory depression, it is postulated that its use with  
50 no or reduced doses of opioids should enable quicker weaning off mechanical ventilation  
51 and support extubation. O'Mara et al., found a significantly shorter duration of mechanical  
52 ventilation in those who received dexmedetomidine compared to those on fentanyl only  
53 (mean  $\pm$  SD: 14.4  $\pm$  7.3 vs. 28.4  $\pm$  9.9;  $p < 0.0001$ ). They also reported that clinicians  
54 extubated 19 of 28 infants who received dexmedetomidine while receiving infusion of the  
55  
56  
57  
58  
59  
60

1  
2  
3 drug at the time of extubation . Due to the early extubation, fewer infants received  
4  
5 dexamethasone (4 vs. 11) and there were fewer chest-X-rays performed (mean  $\pm$  SD:  $28 \pm$   
6  
7  $8.8$  vs.  $49 \pm 13.8$ ) in the dexmedetomidine group compared to those who received fentanyl.  
8  
9

10 The main concerns with dexmedetomidine use are bradycardia and hypotension. In the  
11 general adult population, bradycardia is reported in 5 to 42% and hypotension in 24-56% of  
12 those who receive dexmedetomidine[42]. Chrysostomou et al., found, in 42 neonates, that  
13  
14  
15 the HR decreased by an average of  $12\% \pm 9\%$  and systolic BP decreased by  $14\% \pm 12\%$  at  
16  
17 6-7 hours of starting the dexmedetomidine infusion [30]. Although mostly reported to be not  
18  
19 of clinical significance, dexmedetomidine can induce reduction in HR and BP. Dersch-Mills  
20  
21 et al., analysed adverse effects in 38 infants, 36 of whom were also receiving opioid infusion  
22  
23 and found that 25 had at least one episode of bradycardia (drop of  $>20$ bpm from baseline  
24  
25 lasting for  $>2$  hours) including 7 who had a drop of  $>40$ bpm. Hypotension occurred in 15  
26  
27 infants. Dopamine was used concurrently in 17 infants of which 5 were started on dopamine  
28  
29 after the initiation of dexmedetomidine. No infants had dexmedetomidine infusion  
30  
31 discontinued due to adverse effects [35]. Similarly, Sellas et al., found that 5 of 39 infants  
32  
33 who received dexmedetomidine experienced episodes of bradycardia as compared to 2 of  
34  
35 39 in the no-dexmedetomidine group although all episodes were self-limiting and did not  
36  
37 require any intervention [34]. O'Mara et al., measured BP and HR hourly and did not see any  
38  
39 appreciable effect on either in those on dexmedetomidine compared to the infants on  
40  
41 fentanyl [28] and Morton et al., reported that following their initiative to increase use of  
42  
43 dexmedetomidine in mechanically ventilated infants, one infant had dexmedetomidine  
44  
45 discontinued due to bradycardia without haemodynamic compromise however discontinuing  
46  
47 the drug did not resolve the bradycardia [36]. Estkowski et al., compared neonates in a  
48  
49 Paediatric Intensive Care Unit with older infants and found that among the 28 neonates, 4  
50  
51 experienced hypotension and 2 had bradycardia as compared to 30 and 55 of 99 infants  
52  
53 who had hypotension and bradycardia, respectively. Three neonates required fluid bolus, 1  
54  
55  
56  
57  
58  
59  
60

1  
2  
3 had dopamine infusion started after dexmedetomidine and 4 had dexmedetomidine  
4 discontinued due to adverse events [26].  
5  
6  
7

8 There are no reports of additional adverse events due to dexmedetomidine interacting with  
9 other drugs when used in neonatal care however, polypharmacy is common in neonatal  
10 practice and dexmedetomidine can, potentially interact with other frequently used drugs such  
11 as phenobarbitone (additional central nervous system depression) and others such as, beta-  
12 blockers and diazoxide (worsening of bradycardia and hypotension) [29].  
13  
14  
15  
16  
17  
18  
19

## 20 **Conclusions and recommendations**

21  
22  
23 Emerging clinical data suggest that dexmedetomidine may be an alternative to opioids and  
24 benzodiazepines for managing pain and sedation in mechanically ventilated newborn  
25 infants. It may help reduce the exposure to these agents and as it does not cause respiratory  
26 depression, it may facilitate quicker extubation. The potential neuroprotective effect on the  
27 immature brain could ease the concerns about the impact of pain and stress and that of  
28 opioids and benzodiazepines on the developing brain although other reports suggest that  
29 dexmedetomidine could also adversely impact the newborn brain. However, despite the  
30 creeping acceptance of its use in this population, there are no robust data to demonstrate  
31 either the efficacy or the safety of this drug in preterm infants. The studies discussed above  
32 are observational and mostly retrospective chart reviews. It is encouraging to see robust PK-  
33 PD studies focussing on determining the optimal dose regimens [25]. The initial results  
34 demonstrating pharmacokinetic differences between term and preterm infants suggest that  
35 further population PK-PD studies are required. And a Cochrane systematic review was  
36 registered in 2016 [43] but there are no completed RCTs or systematic reviews of use of  
37 dexmedetomidine in preterm infants. The increasing number of publications of observational  
38 studies and use in clinical practice as seen by the availability of neonatal drug formularies for  
39 its use demonstrates evolving practice that dexmedetomidine is being used in newborn  
40 infants in neonatal units. The data on safety and efficacy are scant and not of high-quality  
41  
42  
43  
44  
45  
46  
47  
48  
49  
50  
51  
52  
53  
54  
55  
56  
57  
58  
59  
60

1  
2  
3 and there are no data on long term neurodevelopmental impact on preterm or term-born  
4 infants. We found one registered pilot RCT [21] in term infants undergoing TH for HIE and  
5 one investigating the use of bolus dose for supporting less invasive surfactant administration  
6 in preterm infants (Table 6).  
7  
8  
9

10  
11  
12 The acceptance of dexmedetomidine in routine clinical practice must be preceded by clinical  
13 evidence. While there is a suggestion that dexmedetomidine may be the agent that could  
14 provide analgesia and sedation with minimal adverse impacts, the available data are not  
15 sufficient to ensure that it is safer than the alternatives used in current practice [44]. Although  
16 all currently used sedatives and analgesics have adverse impact on the preterm brain, new  
17 agents must be investigated thoroughly before being accepted as standard practice. We  
18  
19  
20  
21  
22  
23  
24  
25  
26  
27  
28  
29  
30  
31  
32  
33  
34  
35  
36  
37  
38  
39  
40  
41  
42  
43  
44  
45  
46  
47  
48  
49  
50  
51  
52  
53  
54  
55  
56  
57  
58  
59  
60

need adequately powered and well-designed randomised controlled trials investigating whether dexmedetomidine alone or in conjunction with opioids/benzodiazepines in preterm infants who require analgesia and sedation during mechanical ventilation reduces the need for opioids/benzodiazepine and improves neurodevelopment at 24 months and later as compared to the use of opioids/benzodiazepines alone.

**Table 1. Summary of clinical studies of dexmedetomidine in newborn infants: studies with a comparator group that did not receive any dexmedetomidine**

| Randomised controlled trials or quasi-randomised controlled trials - NONE |                                                                          |                                                                                                            |                                                                                                              |                                                                                              |                                                                                                                                                                                                                                                                                                                                                                                                                                                                                                                 |
|---------------------------------------------------------------------------|--------------------------------------------------------------------------|------------------------------------------------------------------------------------------------------------|--------------------------------------------------------------------------------------------------------------|----------------------------------------------------------------------------------------------|-----------------------------------------------------------------------------------------------------------------------------------------------------------------------------------------------------------------------------------------------------------------------------------------------------------------------------------------------------------------------------------------------------------------------------------------------------------------------------------------------------------------|
| Observational studies with comparator with no dexmedetomidine             |                                                                          |                                                                                                            |                                                                                                              |                                                                                              |                                                                                                                                                                                                                                                                                                                                                                                                                                                                                                                 |
| Reference Setting                                                         | Study design                                                             | Inclusion criteria                                                                                         | Dexmedetomidine group                                                                                        | Comparator                                                                                   | Outcomes Notes                                                                                                                                                                                                                                                                                                                                                                                                                                                                                                  |
| O'Mara 2012 [28]<br>USA<br>Single centre                                  | Retrospective case-control<br>Jan 2005-May 2010                          | <36 weeks' GA at birth,<br>< 2 weeks of life at study entry<br><br>AND<br>receiving mechanical ventilation | N= 24<br>GA: 25.5.±.1.7<br>BW: 832.±.204.2g                                                                  | Fentanyl<br>N=24<br>GA: 24.9.±.1.6<br>BW: 675.±.164.2                                        | Dexmedetomidine group had <ul style="list-style-type: none"> <li>- Shorter duration of treatment (12.5 vs. 20d)</li> <li>- Similar number of sedative boluses per day (1.7 vs. 3) but in total less total additional sedation</li> <li>- More number of days free of additional sedation</li> <li>- Reduction in number of days on mechanical ventilation (14.4(7.3) vs. 28.4(9.9))</li> <li>- Better GI function in including earlier establishment of full feeds</li> <li>- Less late onset sepsis</li> </ul> |
| Sellas 2019 [34]<br>USA<br>Single centre                                  | Retrospective cohort study with matched controls<br>Jan 2010 to Aug 2015 | Invasive surgical procedure<br>Required at least 6h of continuous sedation and/or analgesia                | Received dexmedetomidine in addition to opioids<br>N=39<br>GA: 37 (29-39)<br>PMA at surgery:39 (29-59) weeks | Opioids only (morphine or fentanyl)<br>N= 39<br>GA: 37 (27-38)<br>PMA at surgery: 37 (27-41) | 28/39 (72%) of those who received dexmedetomidine also received opioids<br>Dexmedetomidine group had <ul style="list-style-type: none"> <li>- More episodes of bradycardia (12.8% vs 5.1%; p = 0.01)</li> <li>- No difference in episodes of hypotension or respiratory depression.</li> <li>- Lower cumulative dose of opioids (1155 mcg/kg vs 1841 mcg/kg; p = 0.01)</li> </ul>                                                                                                                               |

|                                          |                                                                                                                         |                                                                                           |                                                                                  |                                                             |                                                                                                                                                                                                                                                                                                                                                                                                             |
|------------------------------------------|-------------------------------------------------------------------------------------------------------------------------|-------------------------------------------------------------------------------------------|----------------------------------------------------------------------------------|-------------------------------------------------------------|-------------------------------------------------------------------------------------------------------------------------------------------------------------------------------------------------------------------------------------------------------------------------------------------------------------------------------------------------------------------------------------------------------------|
|                                          |                                                                                                                         |                                                                                           |                                                                                  |                                                             | - No difference in the number of supplemental doses of opioids                                                                                                                                                                                                                                                                                                                                              |
| Morton 2021 [36]<br>USA<br>Single centre | QI initiative to reduce benzodiazepine exposure during<br>Pre-QI: Jan 2015 to Feb 2018<br>Post-QI: Mar 2018 to Dec 2019 | At least 35 weeks' PMA<br><14 d of sedation<br>Sedation needed for mechanical ventilation | Guideline and QI initiative to promote use of escalating dose of dexmedetomidine | Midazolam and no specific guideline for dexmedetomidine use | Proportion of infants receiving any dexmedetomidine increased from 18% to 49%<br>Infants receiving only dexmedetomidine increased from 3% to 33%<br>Infants receiving any midazolam decreased from 95% to 65%<br>Infants who received dexmedetomidine received less daily midazolam (1.3 mg/kg/d vs. 2.2 mg/kg/d)<br>Increase in midazolam free days<br>No difference in mean duration of sedation episodes |

**Table 2. Summary of clinical studies of dexmedetomidine in newborn infants: studies without a comparator group that did not receive any dexmedetomidine**

| Study ID<br>Setting                         | Study design                                                         | Inclusion criteria                                                                 | Intervention                                                                                                                               | Outcomes                                                                                                                                                             |
|---------------------------------------------|----------------------------------------------------------------------|------------------------------------------------------------------------------------|--------------------------------------------------------------------------------------------------------------------------------------------|----------------------------------------------------------------------------------------------------------------------------------------------------------------------|
| Chrysostomou 2014 [30]<br>USA<br>11 centres | phase II/III, open-label, multicentre safety, efficacy, and PK trial | intubated and mechanically ventilated neonates<br>gestational age ≥28 to ≤44 weeks | Dosing: 3 phases<br>level 1: loading dose (LD), 0.05 mg/kg; maintenance dose (MD), 0.05 mg/kg/h<br>level 2: LD, 0.1 mg/kg; MD, 0.1 mg/kg/h | Need for additional sedation: no preterms; 4 term (midazolam)<br>Need for additional analgesia: 17 (40%) – 3 preterms (fentanyl); 14 term (fentanyl and/or morphine) |

|                                                                   |                                                           |                                                                                                |                                                                                                                            |                                                                                                                                                                                                                                                                                                                                                                                                                                                                                                                                                                                                                                                                                                                              |
|-------------------------------------------------------------------|-----------------------------------------------------------|------------------------------------------------------------------------------------------------|----------------------------------------------------------------------------------------------------------------------------|------------------------------------------------------------------------------------------------------------------------------------------------------------------------------------------------------------------------------------------------------------------------------------------------------------------------------------------------------------------------------------------------------------------------------------------------------------------------------------------------------------------------------------------------------------------------------------------------------------------------------------------------------------------------------------------------------------------------------|
|                                                                   |                                                           | anticipated to require a minimum of 6 hours of continuous IV sedation<br>excluded <1kg infants | level 3: LD, 0.2 mg/kg; MD, 0.2 mg/kg/h.<br>N= 42 (18 preterm; 24 term)<br>N-PASS tool for need of sedation and analgesia  | N-PASS scores: 5% >+3 in pain; 77% between -5 and +3 (adequate) and 18% ≤-6 deep sedation<br><br>HR decreased by an average of 12%±9% at 7.7±7.3 h, and systolic BP decreased by 14%±12% at 6.5±7 h<br><br>Other adverse effects: 26 (62%) patients (11 preterm and 15 term) – diastolic hypotension, hypertension, agitation, respiratory acidosis. No discontinuation, no significant lab or ECG abnormalities                                                                                                                                                                                                                                                                                                             |
| Estkowski 2015 [26]<br>USA PICU<br>Single centre                  | Retrospective chart review<br>Oct 2007 to Aug 2012        | at least 37 weeks PMA                                                                          | Compared neonates (up to 28 days of CGA) to infants (28d CGA to 1y)<br>Neonates: N= 28 (13 born preterm)<br>Infants: N= 99 | Neonates as compared to infants had:<br><ul style="list-style-type: none"><li>- Similar minimum infusion rates</li><li>- Lower median maximum dosage: 0.4 mcg/kg/hr (IQR, 0.26-0.6) vs. 0.6 mcg/kg/hr (IQR, 0.4–0.8) (p &lt; 0.01)</li><li>- Similar duration of use: 41 (17-76) hr</li><li>- Fewer had any episode of bradycardia: 2/28 [7%] vs. 55/99 [56%] (p &lt; 0.01)</li><li>- Similar incidence of hypotension: 4/28 (14%) vs. 30/99 (30%) (p = 0.15)</li></ul> In neonates:<br>3/28 (11%) received a fluid bolus<br>4/28 (14%) dexmedetomidine discontinued due to cardiovascular adverse effects<br><br>In infants:<br>3/99 discontinued infusion due to bradycardia<br>75/99 (76%) had additional sedative agents |
| Dersch-Mills 2019 [35]<br>Canada<br>Single centre (out-born NICU) | Retrospective observational study<br>Dec 2014 to Dec 2016 | Received dexmedetomidine for ≥3 h                                                              | N=38 (30 for surgery)<br>GA: 37.1 (30.7-38.3)<br>17 preterms; 41 (6-74) days old<br>BW: 2605 (1721-3212)                   | 32/38, at least one adverse effect<br><ul style="list-style-type: none"><li>- 15, hypotension</li><li>- 25 bradycardia (drop of ≥20bpm from baseline)</li><li>- 7 severe bradycardia (drop of ≥40 bpm from baseline)</li></ul>                                                                                                                                                                                                                                                                                                                                                                                                                                                                                               |



|  |  |  |                                                                                                                    |                                                                                                                                 |
|--|--|--|--------------------------------------------------------------------------------------------------------------------|---------------------------------------------------------------------------------------------------------------------------------|
|  |  |  | used for mean (range): 11.1(0.13 to 58) days<br>most (36/38) received concomitant opioid infusion, mostly fentanyl | - No dose adjustment or discontinuation for any adverse effect<br><br>Withdrawal: 22/38 had tachycardia and increase NAS scores |
|--|--|--|--------------------------------------------------------------------------------------------------------------------|---------------------------------------------------------------------------------------------------------------------------------|

**Table 3. Summary of case reports of dexmedetomidine in newborn infants**

| Reference Setting      | Case description                                                                                                                                                                                                                                          | outcomes Notes                                                                                                                                   |
|------------------------|-----------------------------------------------------------------------------------------------------------------------------------------------------------------------------------------------------------------------------------------------------------|--------------------------------------------------------------------------------------------------------------------------------------------------|
| Finkel 2007 [32] USA   | 2 day old, 3 kg female<br>Repair of bladder exstrophy<br>Received dexmedetomidine infusion                                                                                                                                                                | Hypothermia and bradycardia – at 0.4mcg/kg/h dose reduced and maintained on 0.2 mcg/kg/h without further adverse events                          |
| O'Mara 2009 [16] USA   | 24 week GA, 9d old infant on high frequency oscillatory ventilation.<br>Was on fentanyl and lorazepam<br>Started at 0.5mcg/kg over 10 min followed by 0.25c/kg/h increased by 0.05-0.1mcg/kg/h every 12 h if needed. Max rate of 0.7mcg/kg/h for 19 days. | Calmed and remained sedated<br>Allowed weaning of ventilation and extubation                                                                     |
| Kubota 2012 [33] Japan | Term infant - ventilated                                                                                                                                                                                                                                  | EEG confirmed seizures, stopped 12h after discontinuation of dexmedetomidine infusion without any antiepileptic medication<br>Normal development |

**Table 4. Clinical studies of use of dexmedetomidine in infants undergoing therapeutic hypothermia for HIE**

| Study ID Setting | Study design | Inclusion criteria | Dexmedetomidine group | Comparator | Outcomes Notes |
|------------------|--------------|--------------------|-----------------------|------------|----------------|
|                  |              |                    |                       |            |                |

|                                                                 |                                                            |                                                               |                                                                                                                                                                                                                        |                                                                                      |                                                                                                                                                                                                                                                                                                                                                                                                                                                                           |
|-----------------------------------------------------------------|------------------------------------------------------------|---------------------------------------------------------------|------------------------------------------------------------------------------------------------------------------------------------------------------------------------------------------------------------------------|--------------------------------------------------------------------------------------|---------------------------------------------------------------------------------------------------------------------------------------------------------------------------------------------------------------------------------------------------------------------------------------------------------------------------------------------------------------------------------------------------------------------------------------------------------------------------|
| <p>O'Mara 2018 [38]<br/>USA<br/>Single centre</p>               | <p>Retrospective cohort study<br/>Jul 2013 to Oct 2016</p> | <p>HIE requiring TH<br/>Received dexmedetomidine for 48 h</p> | <p>N= 19<br/>2, dexmedetomidine only; 17, combination with fentanyl</p>                                                                                                                                                | <p>No comparator</p>                                                                 | <p>Fentanyl weaned down in 13/17 after starting dexmedetomidine<br/><br/>10 infants required inotropes. Initiation of dexmedetomidine did not affect HR, or BP. One infant had bradycardia – resolved with discontinuation of fentanyl<br/><br/>Clinical outcomes: 1 died; 8 had seizures</p>                                                                                                                                                                             |
| <p>Cosnahan 2021 [19]<br/>USA<br/>single centre</p>             | <p>Retrospective cohort study<br/>Jan 2018 to Apr 2020</p> | <p>HIE requiring TH (NICHD criteria)</p>                      | <p>Mar 2019-Apr2020<br/>N= 34<br/><br/>Continuous dexmedetomidine<br/>0.3 mcg/kg/h with increments of 0.1 mcg/kg/hr based on pain scores and breakthrough morphine dose requirements<br/><br/>Maximum: 2 mcg/kg/hr</p> | <p>Jan 2018-Mar 2019<br/>N= 36<br/><br/>Intermittent morphine 0.1 mg/kg every 4h</p> | <p>No difference in N-PASS scores<br/>Dexmedetomidine group had:<br/>- Higher breakthrough morphine requirement: 0.13 (0.13) vs 0.04 (0.09) mg/kg, p = 0.001<br/>- Lower total morphine requirement: 0.13 (0.13) vs 1.79 (0.23) mg/kg, p &lt; 0.0001<br/>- Reduced respiratory support requirement<br/>- Similar outcomes for feeding, EEG and MRI scan<br/><br/>All HR measurement in normal range<br/><br/>- morphine group had higher HR and BP at some timepoints</p> |
| <p>Elliot 2022 [37] abstract only<br/>USA<br/>Single centre</p> | <p>Retrospective cohort<br/><br/>2011-2019</p>             | <p>Dexmedetomidine and/or fentanyl</p>                        | <p>Dexmedetomidine = 46<br/><br/>(14 monotherapy; 32 in combination)</p>                                                                                                                                               | <p>Fentanyl = 120</p>                                                                | <p>Dexmedetomidine group had lower HR: 91 ± 9 vs. 103 ± 11 bpm<br/><br/>Dexmedetomidine was reduced or discontinued in 22 (48%) due to inadequate sedation with low HR</p>                                                                                                                                                                                                                                                                                                |

**Table 5. Dose of dexmedetomidine in newborn infants**

| Study ID                                                                   |                    | Bolus at start of infusion                | Infusion             |                                                                    |                  |                                                                                                                                 |
|----------------------------------------------------------------------------|--------------------|-------------------------------------------|----------------------|--------------------------------------------------------------------|------------------|---------------------------------------------------------------------------------------------------------------------------------|
|                                                                            |                    |                                           | Starting dose        | Increments                                                         | Range / maximum  | Weaning                                                                                                                         |
| O'Mara 2012 [28]                                                           |                    | 0.5 mcg/kg                                | 0.3 mcg/kg/h         | 0.1 mcg/kg/hr twice daily if need for >3 doses of adjunct sedation | 0.3-1.2 mcg/kg/h | 0.1mcg/kg/h every 12 -24 hours                                                                                                  |
| Morton 2021 [36]                                                           |                    | -                                         | 0.5 mcg/kg           | 0.1 to 0.2 mcg/kg/h not more frequently than every 30 min          | 2 mcg/kg/h       | No specific regimen given                                                                                                       |
| Estkowski 2015 [26]                                                        |                    | -                                         |                      |                                                                    |                  |                                                                                                                                 |
| Dersch-Mills 2019 [35]                                                     |                    | -                                         | 0.2-0.3 mcg/kg/hr    | 0.1 mcg/kg/h based on pain and sedation scores                     | 0.5 mcg/kg/h     | No regimen specified – weaned over median of 79 hrs (IQR, 35-175). 10 infants needed clonidine (9 had dexmedetomidine for >10d) |
| Australasian Neonatal Medicines Formulary [45]                             | <37 weeks' GA      | 0.2 mcg/kg                                | 0.2 mcg/kg/h         | 0.1 to 0.2 mcg/kg/h every 30 min                                   | 1 mcg/kg/h       | 0.1 mcg/kg/h every 30 min<br>OR<br>0.2 mcg/kg/h every 8 h                                                                       |
|                                                                            | Term infant ≤ 14 d | 0.35 mcg/kg                               | 0.3 mcg/kg/h         |                                                                    | 1.2 mcg/kg/h     |                                                                                                                                 |
|                                                                            | Term infant > 14 d | 0.5 mcg/kg                                | 0.5 to 0.75 mcg/kg/h |                                                                    | 1.5 mcg/kg/h     |                                                                                                                                 |
| Neonatal Drug Dosing Guideline, IWK Health Centre (personal communication) |                    | 0.5 to 1 mcg/kg<br>“not usually required” | 0.1 to 0.3 mcg/kg/h  | 0.1 cmg/kg/h every 1 to 2 h                                        | 1 mcg/kg/h       | 0.1 mcg/kg/h every 12 to 24 h as tolerated                                                                                      |

**Table 6. Registered clinical trials**

| Study ID                                                                                                                             | Study design                                                                                | Eligibility                                                                                                                                                                                                                                                                                                                                        | Intervention                                                                                      | Comparator                                                                                                         | Outcomes                                                                                                                                                                                |
|--------------------------------------------------------------------------------------------------------------------------------------|---------------------------------------------------------------------------------------------|----------------------------------------------------------------------------------------------------------------------------------------------------------------------------------------------------------------------------------------------------------------------------------------------------------------------------------------------------|---------------------------------------------------------------------------------------------------|--------------------------------------------------------------------------------------------------------------------|-----------------------------------------------------------------------------------------------------------------------------------------------------------------------------------------|
| Dexmedetomidine for LISA Procedure in preterm infants (DEXLISA)<br><a href="#">NCT04820101</a>                                       | Single group assignment<br>Open label<br>Sample size = 40                                   | Inclusion Criteria:<br>- GA 26-36 weeks'<br>- Respiratory distress syndrome requiring surfactant therapy<br>Exclusion Criteria:<br>- Need for emergency intubation in the delivery room<br>- Major congenital malformations or chromosomal anomaly abnormalities<br>- Fetal Hydrops<br>- Hypercapnia<br>- Pneumothorax<br>- Hemodynamic compromise | Dexmedetomidine 1 mcg/kg slowly IV over 10 minutes                                                | None                                                                                                               | Change in Neonatal Infants Pain Scale score before, during and immediately after the procedure<br>In 24 h,<br>- Number of apnoea<br>- Number of severe apnoea<br>- Need for ventilation |
| Dexmedetomidine use in infants undergoing cooling due to neonatal encephalopathy (DICE) Trial<br><a href="#">NCT04772222</a><br>[46] | Randomised controlled trial<br>Parallel<br>1:1 allocation<br>Open label<br>Sample size = 50 | -≥36 weeks' GA with HIE treated with TH.<br>-requiring sedation and/or treatment to prevent shivering during TH as assessed by the Neonatal Pain, Agitation, and Sedation Scale (N-PASS) scores and a                                                                                                                                              | Dexmedetomidine<br>- Loading dose of 1 mcg/kg followed by 0.1 to 0.5 mcg/kg/h continuous infusion | Morphine<br>- Intermittent dosing every 3-4 h of 0.02-0.05 mg/kg/dose or continuous infusion of 0.005-0.01 mg/kg/h | Safety – potential adverse events such as hypotension, hypertension, bradycardia, cardiac arrhythmias, hypothermia, acute renal failure, liver failure, seizures<br><br>Shivering       |

1  
2  
3  
4  
5  
6  
7  
8  
9  
10  
11  
12  
13  
14  
15  
16  
17  
18  
19  
20  
21  
22  
23  
24  
25  
26  
27  
28  
29  
30  
31  
32  
33  
34  
35  
36  
37  
38  
39  
40  
41  
42  
43  
44  
45  
46

|  |  |                                              |  |  |                                                                                                              |
|--|--|----------------------------------------------|--|--|--------------------------------------------------------------------------------------------------------------|
|  |  | modified Bedside Shivering Assessment Scale. |  |  | Days to full oral feeding<br>Mother assessment at 7d, 3-4 mo<br>Neurological assessment at 3-4 mo and 6-9 mo |
|--|--|----------------------------------------------|--|--|--------------------------------------------------------------------------------------------------------------|

Confidential: For Review Only

## References

- 1 Sand L, Szatkowski L, Kwok TC, *et al*. Observational cohort study of changing trends in non-invasive ventilation in very preterm infants and associations with clinical outcomes. *Arch Dis Child Fetal Neonatal Ed* 2021;:fetalneonatal-2021-322390. doi:10.1136/archdischild-2021-322390
- 2 Bellù R, Romantsik O, Nava C, *et al*. Opioids for newborn infants receiving mechanical ventilation. *Cochrane Database Syst Rev* 2021;3:CD013732. doi:10.1002/14651858.CD013732.pub2
- 3 COMMITTEE ON FETUS AND NEWBORN and SECTION ON ANESTHESIOLOGY AND PAIN MEDICINE, Keels E, Sethna N, *et al*. Prevention and Management of Procedural Pain in the Neonate: An Update. *Pediatrics* 2016;137:e20154271. doi:10.1542/peds.2015-4271
- 4 Anand KJ. Clinical importance of pain and stress in preterm neonates. *Biol Neonate* 1998;73:1–9. doi:10.1159/000013953
- 5 Anand KJ, Sippell WG, Aynsley-Green A. Randomised trial of fentanyl anaesthesia in preterm babies undergoing surgery: effects on the stress response. *Lancet* 1987;1:243–8. doi:10.1016/s0140-6736(87)90065-1
- 6 McPherson C, Miller SP, El-Dib M, *et al*. The influence of pain, agitation, and their management on the immature brain. *Pediatr Res* 2020;88:168–75. doi:10.1038/s41390-019-0744-6
- 7 Carbajal R, Eriksson M, Courtois E, *et al*. Sedation and analgesia practices in neonatal intensive care units (EUROPAIN): results from a prospective cohort study. *Lancet Respir Med* 2015;3:796–812. doi:10.1016/S2213-2600(15)00331-8
- 8 Zimmerman KO, Smith PB, Benjamin DK, *et al*. Sedation, Analgesia, and Paralysis during Mechanical Ventilation of Premature Infants. *J Pediatr* 2017;180:99-104.e1. doi:10.1016/j.jpeds.2016.07.001
- 9 Ancora G, Lago P, Garetti E, *et al*. Evidence-based clinical guidelines on analgesia and sedation in newborn infants undergoing assisted ventilation and endotracheal intubation. *Acta Paediatr* 2019;108:208–17. doi:10.1111/apa.14606
- 10 Ancora G, Lago P, Garetti E, *et al*. Efficacy and safety of continuous infusion of fentanyl for pain control in preterm newborns on mechanical ventilation. *J Pediatr* 2013;163:645-651.e1. doi:10.1016/j.jpeds.2013.02.039
- 11 MacGregor R, Evans D, Sugden D, *et al*. Outcome at 5-6 years of prematurely born children who received morphine as neonates. *Arch Dis Child Fetal Neonatal Ed* 1998;79:F40-43. doi:10.1136/fn.79.1.f40
- 12 Puia-Dumitrescu M, Comstock BA, Li S, *et al*. Assessment of 2-Year Neurodevelopmental Outcomes in Extremely Preterm Infants Receiving Opioids and Benzodiazepines. *JAMA Netw Open* 2021;4:e2115998. doi:10.1001/jamanetworkopen.2021.15998

- 13 Al-Turkait A, Szatkowski L, Choonara I, *et al.* Drug utilisation in neonatal units in England and Wales: a national cohort study. *Eur J Clin Pharmacol* Published Online First: 13 January 2022. doi:10.1007/s00228-021-03267-x
- 14 Gertler R, Brown HC, Mitchell DH, *et al.* Dexmedetomidine: a novel sedative-analgesic agent. *Proc (Bayl Univ Med Cent)* 2001;**14**:13–21. doi:10.1080/08998280.2001.11927725
- 15 European Medicines Agency. Dexmedetomidine Accord. 2022. <https://www.ema.europa.eu/en/medicines/human/EPAR/dexmedetomidine-accord#authorisation-details-section> (accessed 11 Feb 2022).
- 16 O'Mara K, Gal P, Ransom JL, *et al.* Successful Use of Dexmedetomidine for Sedation in a 24-Week Gestational Age Neonate. *Ann Pharmacother* 2009;**43**:1707–13. doi:10.1345/aph.1M245
- 17 Mahmoud M, Barbi E, Mason KP. Dexmedetomidine: What's New for Pediatrics? A Narrative Review. *JCM* 2020;**9**:2724. doi:10.3390/jcm9092724
- 18 Schoeler M, Loetscher PD, Rossaint R, *et al.* Dexmedetomidine is neuroprotective in an in vitro model for traumatic brain injury. *BMC Neurol* 2012;**12**:20. doi:10.1186/1471-2377-12-20
- 19 Cosnahan AS, Angert RM, Jano E, *et al.* Dexmedetomidine versus intermittent morphine for sedation of neonates with encephalopathy undergoing therapeutic hypothermia. *J Perinatol* 2021;**41**:2284–91. doi:10.1038/s41372-021-00998-8
- 20 Ren X, Ma H, Zuo Z. Dexmedetomidine Postconditioning Reduces Brain Injury after Brain Hypoxia-Ischemia in Neonatal Rats. *J Neuroimmune Pharmacol* 2016;**11**:238–47. doi:10.1007/s11481-016-9658-9
- 21 Ezzati M, Kawano G, Rocha-Ferreira E, *et al.* Dexmedetomidine Combined with Therapeutic Hypothermia Is Associated with Cardiovascular Instability and Neurotoxicity in a Piglet Model of Perinatal Asphyxia. *Dev Neurosci* 2017;**39**:156–70. doi:10.1159/000458438
- 22 Pancaro C, Segal BS, Sikes RW, *et al.* Dexmedetomidine and ketamine show distinct patterns of cell degeneration and apoptosis in the developing rat neonatal brain. *J Matern Fetal Neonatal Med* 2016;**29**:3827–33. doi:10.3109/14767058.2016.1148132
- 23 Cortes-Ledesma C, Arruza L, Sainz-Villamayor A, *et al.* Dexmedetomidine affects cerebral activity in preterm infants. *Arch Dis Child Fetal Neonatal Ed* 2022;:fetalneonatal-2021-323411. doi:10.1136/archdischild-2021-323411
- 24 Duerden EG, Guo T, Dodbiba L, *et al.* Midazolam dose correlates with abnormal hippocampal growth and neurodevelopmental outcome in preterm infants. *Ann Neurol* 2016;**79**:548–59. doi:10.1002/ana.24601
- 25 van Dijkman SC, De Cock PAJG, Smets K, *et al.* Dose rationale and pharmacokinetics of dexmedetomidine in mechanically ventilated new-borns: impact of design optimisation. *Eur J Clin Pharmacol* 2019;**75**:1393–404. doi:10.1007/s00228-019-02708-y
- 26 Estkowski LM, Morris JL, Sinclair EA. Characterization of Dexmedetomidine Dosing and Safety in Neonates and Infants. *The Journal of Pediatric Pharmacology and Therapeutics* 2015;**20**:112–8. doi:10.5863/1551-6776-20.2.112

- 1
- 2
- 3 27 Potts AL, Anderson BJ, Warman GR, *et al.* Dexmedetomidine pharmacokinetics in
- 4 pediatric intensive care--a pooled analysis. *Paediatr Anaesth* 2009;**19**:1119–29.
- 5 doi:10.1111/j.1460-9592.2009.03133.x
- 6
- 7 28 O'Mara K, Gal P, Wimmer J, *et al.* Dexmedetomidine Versus Standard Therapy with
- 8 Fentanyl for Sedation in Mechanically Ventilated Premature Neonates. *The Journal of*
- 9 *Pediatric Pharmacology and Therapeutics* 2012;**17**:252–62. doi:10.5863/1551-6776-
- 10 17.3.252
- 11
- 12 29 *BNF FOR CHILDREN (BNFC) 2020-2021*. S.I.: : PHARMACEUTICAL PRESS 2020.
- 13
- 14 30 Chrysostomou C, Schulman SR, Herrera Castellanos M, *et al.* A Phase II/III, Multicenter,
- 15 Safety, Efficacy, and Pharmacokinetic Study of Dexmedetomidine in Preterm and Term
- 16 Neonates. *The Journal of Pediatrics* 2014;**164**:276-282.e3.
- 17 doi:10.1016/j.jpeds.2013.10.002
- 18
- 19 31 McAdams RM, Pak D, Lalovic B, *et al.* Dexmedetomidine Pharmacokinetics in Neonates
- 20 with Hypoxic-Ischemic Encephalopathy Receiving Hypothermia. *Anesthesiology*
- 21 *Research and Practice* 2020;**2020**:1–15. doi:10.1155/2020/2582965
- 22
- 23 32 Finkel JC, Quezado ZMN. Hypothermia-induced bradycardia in a neonate receiving
- 24 dexmedetomidine. *J Clin Anesth* 2007;**19**:290–2. doi:10.1016/j.jclinane.2006.08.011
- 25
- 26 33 Kubota T, Fukasawa T, Kitamura E, *et al.* Epileptic seizures induced by
- 27 dexmedetomidine in a neonate. *Brain and Development* 2013;**35**:360–2.
- 28 doi:10.1016/j.braindev.2012.05.011
- 29
- 30 34 Sellas MN, Kyllonen KC, Lepak MR, *et al.* Dexmedetomidine for the Management of
- 31 Postoperative Pain and Sedation in Newborns. *The Journal of Pediatric Pharmacology*
- 32 *and Therapeutics* 2019;**24**:227–33. doi:10.5863/1551-6776-24.3.227
- 33
- 34 35 Dersch-Mills DA, Banasch HL, Yusuf K, *et al.* Dexmedetomidine Use in a Tertiary Care
- 35 NICU: A Descriptive Study. *Ann Pharmacother* 2019;**53**:464–70.
- 36 doi:10.1177/1060028018812089
- 37
- 38 36 Morton SU, Labrecque M, Moline M, *et al.* Reducing Benzodiazepine Exposure by
- 39 Instituting a Guideline for Dexmedetomidine Usage in the NICU. *Pediatrics*
- 40 2021;**148**:e2020041566. doi:10.1542/peds.2020-041566
- 41
- 42 37 Elliott M, Burnsed J, Heinan K, *et al.* Effect of dexmedetomidine on heart rate in
- 43 neonates with hypoxic ischemic encephalopathy undergoing therapeutic hypothermia. *J*
- 44 *Neonatal Perinatal Med* 2022;**15**:47–54. doi:10.3233/NPM-210737
- 45
- 46 38 O'Mara K, Weiss M. Dexmedetomidine for Sedation of Neonates with HIE Undergoing
- 47 Therapeutic Hypothermia: A Single-Center Experience. *AJP Rep* 2018;**08**:e168–73.
- 48 doi:10.1055/s-0038-1669938
- 49
- 50 39 Inserra E, Colella U, Caredda E, *et al.* Safety and effectiveness of intranasal
- 51 dexmedetomidine together with midazolam for sedation in neonatal MRI. *Pediatr*
- 52 *Anaesth* 2022;**32**:79–81. doi:10.1111/pan.14307
- 53
- 54 40 Bua J, Massaro M, Cossovel F, *et al.* Intranasal dexmedetomidine, as midazolam-
- 55 sparing drug, for MRI in preterm neonates. *Paediatr Anaesth* 2018;**28**:747–8.
- 56 doi:10.1111/pan.13454
- 57
- 58
- 59
- 60



- 1  
2  
3 41 Stark A, Smith PB, Hornik CP, *et al.* Medication Use in the Neonatal Intensive Care Unit  
4 and Changes from 2010 to 2018. *J Pediatr* 2022;**240**:66-71.e4.  
5 doi:10.1016/j.jpeds.2021.08.075  
6  
7 42 UpToDate. Lexicomp-UpToDate Dexmedetomidine: Pediatric drug information.  
8 <https://www.uptodate.com/contents/table-of-contents/drug-information> (accessed 29 Mar  
9 2022).  
10  
11 43 Ibrahim M, Jones LJ, Lai NM, *et al.* Dexmedetomidine for analgesia and sedation in  
12 newborn infants receiving mechanical ventilation. *Cochrane Database of Systematic*  
13 *Reviews* Published Online First: 17 September 2016. doi:10.1002/14651858.CD012361  
14  
15 44 Barrington K. Dexmedetomidine:new wonder drug or next neonatal disaster? Neonatal  
16 Research. 2022.[https://neonatalresearch.org/2022/03/23/dexmedetomidine-new-](https://neonatalresearch.org/2022/03/23/dexmedetomidine-new-wonder-drug-or-next-neonatal-disaster/)  
17 [wonder-drug-or-next-neonatal-disaster/](https://neonatalresearch.org/2022/03/23/dexmedetomidine-new-wonder-drug-or-next-neonatal-disaster/) (accessed 19 Apr 2022).  
18  
19 45 Australasian Neonatal Medicines Formulary. Dexmedetomidine: neowborn use only.  
20 2021.[https://www.anmfonline.org/wp-content/uploads/2021/06/dexmedetomidine-](https://www.anmfonline.org/wp-content/uploads/2021/06/dexmedetomidine-18022021-2.0.pdf)  
21 [18022021-2.0.pdf](https://www.anmfonline.org/wp-content/uploads/2021/06/dexmedetomidine-18022021-2.0.pdf)  
22  
23 46 Baserga M, DuPont TL, Ostrander B, *et al.* Dexmedetomidine Use in Infants Undergoing  
24 Cooling Due to Neonatal Encephalopathy (DICE Trial): A Randomized Controlled Trial:  
25 Background, Aims and Study Protocol. *Front Pain Res* 2021;**2**:770511.  
26 doi:10.3389/fpain.2021.770511  
27  
28  
29  
30  
31  
32  
33  
34  
35  
36  
37  
38  
39  
40  
41  
42  
43  
44  
45  
46  
47  
48  
49  
50  
51  
52  
53  
54  
55  
56  
57  
58  
59  
60
